# Supplementary material
Source: publisher figshare collection journal article supplement (https://karger.figshare.com/ndownloader/files/24089624)
Supplement: Supplementary file 1 [file 24089624]

## Sheet: SPERM
Supplementary Table S5. UniProtKB annotations relating to the functions of the proteins in all six sets
For details on parameter inference, see Materials and Methods.
SPERM sample
								UniProtKB visited at 9th of May 2020
	Protein Stable ID	UniProtKB functional annotation	Gene name	exocyt+endocyt+vesic+lysosom+proteasom+exocr+secern+secret	signal+cytokin (inkl. references to hormonal signaling; excl. cytokinesis)	hormon+andro+follicl+estro+prosta+insul+cortico+steroid+testost+endocr (excl. follicle development)	spermato+acrosom+test (excl. testost)	Function (according to UniProtKB and symbol/name)		GO - Molecular Function
	ENSP00000160373	https://www.uniprot.org/uniprot/Q8WZ74	CTTNBP2					Neuron differentiation
	ENSP00000200135	https://www.uniprot.org/uniprot/O43264	ZW10					Mitosis control; spindle apparatus
	ENSP00000209873	https://www.uniprot.org/uniprot/Q9NRG9	AAAS					Neuron differentiation; spindle apparatus; microtubules
	ENSP00000219313	https://www.uniprot.org/uniprot/P51665	PSMD7					Proteasome; ubiquitination
	ENSP00000220584	https://www.uniprot.org/uniprot/P37268	FDFT1					Synthase
	ENSP00000222120	https://www.uniprot.org/uniprot/O95716	RAB3D	x				Protein transport; probably involved in regulated exocytosis
	ENSP00000226105	https://www.uniprot.org/uniprot/Q9HD47	RANGRF					Intracellular trafficking; spindle dynamics
	ENSP00000231061	https://www.uniprot.org/uniprot/P09486	SPARC					Binds calcium and several proteins
	ENSP00000238561	https://www.uniprot.org/uniprot/Q86TW2	ADCK1					Kinase; important for mitochondrial inner structures
	ENSP00000241041	https://www.uniprot.org/uniprot/Q9Y5Y5	PEX16					Symbol -> peroxisome
	ENSP00000249269	https://www.uniprot.org/uniprot/O75439	PMPCB					Peptidase subunit; mitochondrial-processing subunit; catalytic subunit of the essential mitochondrial processing protease
	ENSP00000250244	https://www.uniprot.org/uniprot/Q9Y6Q5	AP1M2		x			Recruitment of clathrin to membranes and the recognition of sorting signals
	ENSP00000252137	https://www.uniprot.org/uniprot/Q96DF8	ESS2					Symbol -> Splicing
	ENSP00000253055	https://www.uniprot.org/uniprot/Q02779	MAP3K10		x			Symbol -> Kinase		Signal transduction
	ENSP00000258091	https://www.uniprot.org/uniprot/Q99832	CCT7					Chaperone; telomere maintenance
	ENSP00000260187	https://www.uniprot.org/uniprot/O75604	USP2					Ubiquitination; cell-cycle progression; circadian clock
	ENSP00000261615	https://www.uniprot.org/uniprot/P16444	DPEP1					Symbol -> Dipeptidase; possesses also beta lactamase activity and hydrolytically inactivates beta-lactam antibiotics
	ENSP00000262507	https://www.uniprot.org/uniprot/O75208	COQ9					Lipid-binding; mitochondrial ubiquinone biosythesis protein subunit; an essential lipid-soluble electron transporter for aerobic cellular respiration
	ENSP00000263056	https://www.uniprot.org/uniprot/P41279	MAP3K8					Kinase; pro-inflammatory response
	ENSP00000263897	https://www.uniprot.org/uniprot/Q9NZ43	USE1	x				Vesicle transport; protein receptor (SNARE)
	ENSP00000264708	https://www.uniprot.org/uniprot/P01189	POMC							Receptor binding
	ENSP00000265983	https://www.uniprot.org/uniprot/P02790	HPX					Binds heme and transports it to liver
	ENSP00000266682	https://www.uniprot.org/uniprot/Q9H2J7	SLC6A15					Amino acid transporter
	ENSP00000274376	https://www.uniprot.org/uniprot/P20936	RASA1		x			Activates Ras GTPase		Signaling receptor binding
	ENSP00000286800	https://www.uniprot.org/uniprot/O14867	BACH1					Transcription factor		DNA-binding; heme binding
	ENSP00000287295	https://www.uniprot.org/uniprot/O95831	AIFM1					NADH oxidoreductase; mitochondrial apoptosis factor
	ENSP00000288937	https://www.uniprot.org/uniprot/Q9NRX2	MRPL17					Mitochondrial ribosomal protein
	ENSP00000290216	https://www.uniprot.org/uniprot/Q96FV2	SCRN2					GO -> Dipeptidase		Dipeptidase activity
	ENSP00000303058	https://www.uniprot.org/uniprot/Q8N960	CEP120					Centrosome; microtubules; neuron differentiation; ciliogenesis
	ENSP00000304891	https://www.uniprot.org/uniprot/Q96A05	ATP6V1E2				x	ATPase subunit; this isoform is essential for energy coupling involved in acidification of acrosome
	ENSP00000304895	https://www.uniprot.org/uniprot/P35568	IRS1		x	x		Binds various proteins; thereunder insulin receptor		Signaling
	ENSP00000309132	https://www.uniprot.org/uniprot/Q9BZR8	BCL2L14		x			Apoptosis facilitator		Protein kinase binding; signaling
	ENSP00000309430	https://www.uniprot.org/uniprot/Q96S52	PIGS					GPI transamidase component		Anchoring of glycoproteins to membrane
	ENSP00000317000	https://www.uniprot.org/uniprot/Q9BZW5	TM6SF1					May function as sterol isomerase
	ENSP00000317159	https://www.uniprot.org/uniprot/P08574	CYC1					Component of the ubiquinol-cytochrome c oxidoreductase; mitochondrial electron transport chain
	ENSP00000321584	https://www.uniprot.org/uniprot/P12268	IMPDH2					Dehydrogenase; de novo synthesis of guanine nucleotides
	ENSP00000332118	https://www.uniprot.org/uniprot/P54753	EPHB3		x			Ephrin receptor; leading to contact-dependent bidirectional signaling into neighboring cells; neuron differentiation; regulate migration and adhesion of cells that tubularize the urethra and septate the cloaca
	ENSP00000333024	https://www.uniprot.org/uniprot/Q9BWX1	PHF7							Metal ion binding
	ENSP00000333666	https://www.uniprot.org/uniprot/Q9BV57	ADI1					Dioxygenase; downregulates cell migration
	ENSP00000340093	https://www.uniprot.org/uniprot/Q6IQ20	NAPEPLD					Phospholipase; regulates energy homeostasis
	ENSP00000342121	https://www.uniprot.org/uniprot/Q9Y252	RNF6	x				Ligase; ubiquitination; proteasome
	ENSP00000342262	https://www.uniprot.org/uniprot/Q8NFH3	NUP43					Nuclear pore complex; kinetochore microtubule attachment; mitotic progression and chromosome segregation
	ENSP00000342793	https://www.uniprot.org/uniprot/Q13393	PLD1		x			Phospholipase; signal transduction; membrane trafficking; and the regulation of mitosis
	ENSP00000344668	https://www.uniprot.org/uniprot/O00522	KRIT1		x			Signaling; microtubule-associated protein; maintenance of the intracellular reactive oxygen species (ROS) homeostasis to prevent oxidative cellular damage
	ENSP00000345917	https://www.uniprot.org/uniprot/Q9NX58	LYAR					Maintenance of the appropriate processing of pre-RNAs; prevents nucleolin/NCL self-cleavage; maintaining a normal steady-state level of NCL protein in undifferentiated embryonic stem cells (ESCs); which in turn is essential for ESC self-renewal
	ENSP00000347161	https://www.uniprot.org/uniprot/Q9BZW7	TSGA10				x	Testis-specific gene 10 protein; plays a role in spermatogenesis
	ENSP00000347792	https://www.uniprot.org/uniprot/O15056	SYNJ2		x			Inositol 5-phosphatase which may be involved in distinct membrane trafficking and signal transduction pathways
	ENSP00000348471	https://www.uniprot.org/uniprot/Q96HL8	SH3YL1							Phosphatase binding; phosphatidylinositol binding
	ENSP00000349244	https://www.uniprot.org/uniprot/Q3B7T1	EDRF1					Transcription factor
	ENSP00000350094	https://www.uniprot.org/uniprot/Q2TAL8	QRICH1							Regulation of transcription by RNA polymerase II; regulation of morphogenesis
	ENSP00000351717	https://www.uniprot.org/uniprot/Q9NUT2	ABCB8					Mitochondrial potassium channel ATP-binding subunit
	ENSP00000352408	https://www.uniprot.org/uniprot/Q9NWV8	BABAM1					BRISC and BRCA1-A complex member 1; DNA double strand break repair; spindle formation; microtubules
	ENSP00000355237	https://www.uniprot.org/uniprot/Q9Y5S2	CDC42BPB					Kinase; regulation of cytoskeleton reorganization and cell migration
	ENSP00000357922	https://www.uniprot.org/uniprot/Q9BUN1	C1orf56					Involved in control of cellular proliferation
	ENSP00000358045	https://www.uniprot.org/uniprot/Q16610	ECM1					Extracellular matrix protein 1
	ENSP00000359799	https://www.uniprot.org/uniprot/Q9UDY4	DNAJB4					Probable chaperone; stimulates ATP hydrolysis and the folding of unfolded proteins mediated by HSPA1A/B
	ENSP00000359925	https://www.uniprot.org/uniprot/Q9BTT6	LRRC1
	ENSP00000360286	https://www.uniprot.org/uniprot/P78406	RAE1					Plays a role in mitotic bipolar spindle formation; binds mRNA; may function in nucleocytoplasmic transport and in directly or indirectly attaching cytoplasmic mRNPs to the cytoskeleton		Microtubule binding
	ENSP00000362590	https://www.uniprot.org/uniprot/Q9NU19	TBC1D22B					May act as a GTPase-activating protein for Rab family protein(s)		Regulation of cilium assembly
	ENSP00000364133	https://www.uniprot.org/uniprot/P36897	TGFBR1		x			Receptor component; signal transduction form cellular surface to cytoplasm; plethora of physiological and pathological processes
	ENSP00000367721	https://www.uniprot.org/uniprot/Q12769	NUP160					Functions as a component of the nuclear pore complex		Structural constituent of nuclear pore
	ENSP00000370839	https://www.uniprot.org/uniprot/Q16585	SGCB					Link between the F-actin cytoskeleton and the extracellular matrix		Sarcolemma; cytoskeleton
	ENSP00000377390	https://www.uniprot.org/uniprot/Q5H9R7	PPP6R3					Phosphatase regulatory subunit; may have an important role in maintaining immune self-tolerance
	ENSP00000381425	https://www.uniprot.org/uniprot/Q13368	MPP3
	ENSP00000384273	https://www.uniprot.org/uniprot/Q04206	RELA					Pleiotropic transcription facor initiated by a vast array of stimuli related to many biological processes such as inflammation, immunity, differentiation, cell growth, tumorigenesis and apoptosis; DNA binding		DNA binding; enzyme binding; protein kinase binding
	ENSP00000393183	https://www.uniprot.org/uniprot/Q9Y4B6	DCAF1		x	x		Substrate recognition component of E3 ubiquitin-protein ligase complexes and as an atypical serine/threonine-protein kinase; playing key roles in various processes such as cell cycle, telomerase regulation and histone modification; ubiquitination; it is recruited by RAG1 to ubiquitinate proteins; leading to limit error-prone repair during V(D)J recombination; apoptosis during cell competition		ATP binding; estrogen receptor binding; histone kinase activity
	ENSP00000394405	https://www.uniprot.org/uniprot/Q8TBF2	PRXL2B		x	x		Synthase; catalyzes the reduction of prostaglandin-ethanolamide H2 (prostamide H2) to prostamide F(2alpha) with NADPH as proton donor; also able to reduce prostaglandin H2 to prostaglandin F(2alpha)
	ENSP00000398688	https://www.uniprot.org/uniprot/Q8N398	VWA5B2					von Willebrand factor A domain-containing protein 5B2
	ENSP00000402584	https://www.uniprot.org/uniprot/Q8NFP4	MDGA1					MAM domain-containing; neuron migration; synapse formation
	ENSP00000402608	https://www.uniprot.org/uniprot/P31327	CPS1					Synthase; mitochondrial; involved in the urea cycle of ureotelic animals where the enzyme plays an important role in removing excess ammonia from the cell
	ENSP00000406012	https://www.uniprot.org/uniprot/Q96RY7	IFT140					Intraflagellar transport protein 140 homolog; plays a pivotal role in proper development and function of ciliated cells through its role in ciliogenesis and/or cilium maintenance
	ENSP00000415430	https://www.uniprot.org/uniprot/Q9NYZ3	GTSE1					Interfering with microtubule rearrangements that are required to enter mitosis; overexpression delays G2/M phase progression
	ENSP00000417653	https://www.uniprot.org/uniprot/Q9UJU6	DBNL	x				Binds F-actin and DNM1, and thereby plays a role in receptor-mediated endocytosis; plays a role in the reorganization of the actin cytoskeleton; formation of cell projections; such as neurites; immunological synapses
	ENSP00000420854	https://www.uniprot.org/uniprot/Q6NXP0	EFCAB12							Calcium ion binding; protein binding
	ENSP00000435466	https://www.uniprot.org/uniprot/Q8IZU9	KIRREL3					Synaptic adhesion molecule; may be involved in the hematopoietic supportive capacity of stroma cells
	ENSP00000438262	https://www.uniprot.org/uniprot/Q9UDY2	TJP2							Cadherin binding; bicellular tight junction
	ENSP00000473172	https://www.uniprot.org/uniprot/Q9Y230	RUVBL2					Single-stranded DNA-stimulated ATPase and DNA helicase activity; component of the NuA4 histone acetyltransferase complex which is involved in transcriptional activation; NuA4 may also play a direct role in DNA repair when recruited to sites of DNA damage; proposed core component of the chromatin remodeling INO80 complex which exhibits DNA- and nucleosome-activated ATPase activity and catalyzes AT…
			NX	4	12	3	2

## Sheet: TESTIS
Supplementary Table S5. UniProtKB annotations relating to the functions of the proteins in all six sets
For details on parameter inference, see Materials and Methods.
TESTIS sample
								UniProtKB visited at 10th of May 2020
	Protein Stable ID	UniProtKB functional annotation	Gene name	exocyt+endocyt+vesic+lysosom+proteasom+exocr+secern+secret	signal+cytokin (inkl. references to hormonal signaling; excl. cytokinesis)	hormon+andro+follicl+estro+prosta+insul+cortico+steroid+testost+endocr (excl. follicle development)	spermato+acrosom+test (excl. testost)	Function (according to UniProtKB and symbol/name)		GO - Molecular Function
	ENSP00000003084	https://www.uniprot.org/uniprot/P13569	CFTR					Epithelial ion channel that plays an important role in the regulation of epithelial ion and water transport and fluid homeostasis
	ENSP00000005558	https://www.uniprot.org/uniprot/O00458	IFRD1					Could play a role in regulating gene activity in the proliferative and/or differentiative pathways induced by NGF
	ENSP00000157600	https://www.uniprot.org/uniprot/Q9NZU5	LMCD1					Transcriptional cofactor
	ENSP00000196371	https://www.uniprot.org/uniprot/P55809	OXCT1					Transferase, mitochondrial; key enzyme for ketone body catabolism
	ENSP00000211998	https://www.uniprot.org/uniprot/P18206	VCL					Actin filament (F-actin)-binding protein involved in cell-matrix adhesion and cell-cell adhesion
	ENSP00000216254	https://www.uniprot.org/uniprot/Q99798	ACO2					Hydratase; mitochondrial
	ENSP00000218516	https://www.uniprot.org/uniprot/P06280	GLA					Symbol -> Galactosidase
	ENSP00000220166	https://www.uniprot.org/uniprot/P09668	CTSH					Hydratase; hydrolysis of proteins, acting as an aminopeptidase (notably, cleaving Arg-|-Xaa bonds) as well as an endopeptidase
	ENSP00000222553	https://www.uniprot.org/uniprot/P43490	NAMPT					Phosphoribosyltransferase; catalyzes the condensation of nicotinamide with 5-phosphoribosyl-1-pyrophosphate to yield nicotinamide mononucleotide, an intermediate in the biosynthesis of NAD It is the rate limiting component in the mammalian NAD biosynthesis pathway
	ENSP00000227251	https://www.uniprot.org/uniprot/P02511	CRYAB					May contribute to the transparency and refractive index of the lens; has chaperone-like activity, preventing aggregation of various proteins under a wide range of stress conditions
	ENSP00000233710	https://www.uniprot.org/uniprot/P28330	ACADL					Dehydrogenase; mitochondrial; long-chain specific acyl-CoA dehydrogenase is one of the acyl-CoA dehydrogenases that catalyze the first step of mitochondrial fatty acid beta-oxidation, an aerobic process breaking down fatty acids into acetyl-CoA and allowing the production of energy from fats
	ENSP00000236850	https://www.uniprot.org/uniprot/P02647	APOA1				x	Participates in the reverse transport of cholesterol from tissues to the liver for excretion by promoting cholesterol efflux from tissues and by acting as a cofactor for the lecithin cholesterol acyltransferase (LCAT) as part of the SPAP complex, activates spermatozoa motility
	ENSP00000242592	https://www.uniprot.org/uniprot/P16219	ACADS					Short-chain specific acyl-CoA dehydrogenase is one of the acyl-CoA dehydrogenases that catalyze the first step of mitochondrial fatty acid beta-oxidation, an aerobic process breaking down fatty acids into acetyl-CoA and allowing the production of energy from fats
	ENSP00000244061	https://www.uniprot.org/uniprot/Q9Y508	RNF114				x	E3 ubiquitin-protein ligase that promotes the ubiquitination of various substrates; in turn, participates in the regulation of many biological processes including cell cycle, apoptosis, osteoclastogenesis as well as innate or adaptive immunity; this activity stimulates cell cycle G1-to-S phase transition and suppresses cellular senescence; may play a role in spermatogenesis
	ENSP00000246949	https://www.uniprot.org/uniprot/P24855	DNASE1	x	x	x		Serum endocuclease secreted into body fluids by a wide variety of exocrine and endocrine organs; is required to prevent formation of clots that obstruct blood vessels and cause organ damage following inflammation
	ENSP00000258962	https://www.uniprot.org/uniprot/Q07955	SRSF1					Plays a role in preventing exon skipping, ensuring the accuracy of splicing and regulating alternative splicing; interacts with other spliceosomal components
	ENSP00000260129	https://www.uniprot.org/uniprot/Q96RS0	TGS1					Synthase; catalyzes the 2 serial methylation steps; plays a role in transcriptional regulation
	ENSP00000261254	https://www.uniprot.org/uniprot/P30279	CCND2					Regulatory component of the cyclin D2-CDK4 (DC) complex
	ENSP00000261733	https://www.uniprot.org/uniprot/P05091	ALDH2					Dehydrogenase, mitochondrial
	ENSP00000263579	https://www.uniprot.org/uniprot/Q96C86	DCPS					Diphosphatase; decapping scavenger enzyme that catalyzes the cleavage of a residual cap structure following the degradation of mRNAs by the 3'->5' exosome-mediated mRNA decay pathway; plays a role in first intron splicing of pre-mRNAs; inhibits activation-induced cell death
	ENSP00000265983	https://www.uniprot.org/uniprot/P02790	HPX					Binds heme and transports it to the liver for breakdown and iron recovery, after which the free hemopexin returns to the circulation
	ENSP00000270142	https://www.uniprot.org/uniprot/P00441	SOD1					Dismutase; destroys radicals which are normally produced within the cells and which are toxic to biological systems
	ENSP00000273398	https://www.uniprot.org/uniprot/P38606	ATP6V1A					Catalytic subunit of the peripheral V1 complex of vacuolar ATPase; V-ATPase vacuolar ATPase is responsible for acidifying a variety of intracellular compartments in eukaryotic cells; in aerobic conditions, involved in intracellular iron homeostasis
	ENSP00000276449	https://www.uniprot.org/uniprot/P49675	STAR		x	x		Plays a key role in steroid hormone synthesis by enhancing the metabolism of cholesterol into pregnenolone; mediates the transfer of cholesterol from the outer mitochondrial membrane to the inner mitochondrial membrane
	ENSP00000276914	https://www.uniprot.org/uniprot/Q99541	PLIN2					May be involved in development and maintenance of adipose tissue
	ENSP00000287936	https://www.uniprot.org/uniprot/P04035	HMGCR					Reductase; transmembrane glycoprotein that is the rate-limiting enzyme in cholesterol biosynthesis as well as in the biosynthesis of nonsterol isoprenoids that are essential for normal cell function including ubiquinone and geranylgeranyl proteins
	ENSP00000290541	https://www.uniprot.org/uniprot/P28070	PSMB4	x			x	Component of the 20S core proteasome complex involved in the proteolytic degradation of most intracellular proteins; this type of proteolysis is required in several pathways including spermatogenesis
	ENSP00000291565	https://www.uniprot.org/uniprot/O00764	PDXK					Kinase; required for synthesis of pyridoxal-5-phosphate from vitamin B6
	ENSP00000295688	https://www.uniprot.org/uniprot/P49368	CCT3	x				Component of the chaperonin-containing T-complex (TRiC), a molecular chaperone complex that assists the folding of proteins upon ATP hydrolysis; as part of the TRiC complex may play a role in the assembly of BBSome, a complex involved in ciliogenesis regulating transports vesicles to the cilia; probably, the TRiC complex plays a role in the folding of actin and tubulin
	ENSP00000295834	https://www.uniprot.org/uniprot/P07148	FABP1					Liver; plays a role in lipoprotein-mediated cholesterol uptake in hepatocytes		Antoxidant activity
	ENSP00000295897	https://www.uniprot.org/uniprot/P02768	ALB		x	x		Serum albumin, the main protein of plasma, has a good binding capacity for water, Ca2+, Na+, K+, fatty acids, hormones, and bilirubin
	ENSP00000296255	https://www.uniprot.org/uniprot/P04843	RPN1					Subunit of the oligosaccharyl transferase (OST) complex that catalyzes the initial transfer of a defined glycan
	ENSP00000299518	https://www.uniprot.org/uniprot/P50213	IDH3A					Catalytic subunit of the mitochondrial dehydrogenase which catalyzes the decarboxylation of isocitrate (ICT) into alpha-ketoglutarate
	ENSP00000301455	https://www.uniprot.org/uniprot/Q9BY76	ANGPTL4					Mediates inactivation of the lipoprotein lipase LPL, and thereby plays a role in the regulation of triglyceride clearance from the blood serum and in lipid metabolism; inhibits proliferation, migration, and tubule formation of endothelial cells and reduces vascular leakage; inhibits the adhesion of endothelial cell to the extracellular matrix (ECM), and inhibits the reorganization of the actin cy…
	ENSP00000302100	https://www.uniprot.org/uniprot/P56470	LGALS4					Galectin that binds lactose and a related range of sugars; may be involved in the assembly of adherens junctions
	ENSP00000304467	https://www.uniprot.org/uniprot/P52888	THOP1					Involved in the metabolism of neuropeptides under 20 amino acid residues long Involved in cytoplasmic peptide degradation; able to degrade the amyloid-beta precursor protein and generate amyloidogenic fragments
	ENSP00000308938	https://www.uniprot.org/uniprot/P00747	PLG					Plasmin dissolves the fibrin of blood clots and acts as a proteolytic factor in a variety of other processes including embryonic development, tissue remodeling, tumor invasion, and inflammation; in ovulation, weakens the walls of the Graafian follicle; also cleaves fibrin, thrombospondin and von Willebrand factor
	ENSP00000310688	https://www.uniprot.org/uniprot/Q9UBJ2	ABCD2					Probable transporter		ATPase activity
	ENSP00000311113	https://www.uniprot.org/uniprot/P14923	JUP					Common junctional plaque protein; the membrane-associated plaques are architectural elements in an important strategic position to influence the arrangement and function of both the cytoskeleton and the cells within the tissue; the presence of plakoglobin in both the desmosomes and in the intermediate junctions suggests that it plays a central role in the structure and function of submembranous p…
	ENSP00000315925	https://www.uniprot.org/uniprot/Q96IJ6	GMPPA					Mannose-1-guanlytransferase; my serve as a regulatory subunit and allow allosteric feedback inhibition of GMPPB by GDP-mannose
	ENSP00000317997	https://www.uniprot.org/uniprot/Q9NRD9	DUOX1		x	x		Oxidase; plays a role in thyroid hormones synthesis and lactoperoxidase-mediated antimicrobial defense at the surface of mucosa
	ENSP00000319308	https://www.uniprot.org/uniprot/O15539	RGS5		x			Inhibits signal transduction
	ENSP00000321259	https://www.uniprot.org/uniprot/P37837	TALDO1					Transaldolase is important for the balance of metabolites in the pentose-phosphate pathway
	ENSP00000325527	https://www.uniprot.org/uniprot/P35555	FBN1					Structural component of the 10-12 nm diameter microfibrils of the extracellular matrix, which conveys both structural and regulatory properties to load-bearing connective tissues		Extracellular matrix constituent conferring elasticity; protein binding
	ENSP00000327070	https://www.uniprot.org/uniprot/P40926	MDH2					Dehydrogenase; mitochondrial		L-malate dehydrogenase activity
	ENSP00000331897	https://www.uniprot.org/uniprot/P48735	IDH2					Dehydrogenase; mitochondrial; plays a role in intermediary metabolism and energy production; it may tightly associate or interact with the pyruvate dehydrogenase complex
	ENSP00000333821	https://www.uniprot.org/uniprot/Q01718	MC2R		x	x		Receptor for the hormone corticotropin (ACTH); this receptor is mediated by G proteins (G(s)) which activate adenylate cyclase (cAMP)
	ENSP00000335203	https://www.uniprot.org/uniprot/Q9UII2	ATP5IF1					Mitochondrial; endogenous F1F(o)-ATPase inhibitor limiting ATP depletion
	ENSP00000337853	https://www.uniprot.org/uniprot/Q9Y4K3	TRAF6		x			E3 ubiquitin ligase; this protein is involved in the pathway protein ubiquitination, which is part of Protein modification; MAPK and AKT signaling; possibly: immunoglobin production
	ENSP00000338072	https://www.uniprot.org/uniprot/P30518	AVPR2					Receptor for arginine vasopressin
	ENSP00000341117	https://www.uniprot.org/uniprot/Q96GA7	SDSL					Has low serine dehydratase and threonine dehydratase activity
	ENSP00000345230	https://www.uniprot.org/uniprot/K7ENT6	TPM4					Tropomyosin alpha-4 chain (unreviewed entry)
	ENSP00000346032	https://www.uniprot.org/uniprot/P07355	ANXA2					Calcium-regulated membrane-binding protein whose affinity for calcium is greatly enhanced by anionic phospholipids		Cytoskeletal protein binding
	ENSP00000346901	https://www.uniprot.org/uniprot/Q01740	FMO1					Monooxygenase; this protein is involved in the oxidative metabolism of a variety of xenobiotics such as drugs and pesticides
	ENSP00000351410	https://www.uniprot.org/uniprot/P10644	PRKAR1A		x			Regulatory subunit of the cAMP-dependent protein kinases involved in cAMP signaling in cells		Axoneme
	ENSP00000352272	https://www.uniprot.org/uniprot/Q9NP98	MYOZ1		x			Myozenins may serve as intracellular binding proteins involved in linking Z-disk proteins such as alpha-actinin, gamma-filamin, TCAP/telethonin, LDB3/ZASP and localizing calcineurin signaling to the sarcomere; plays an important role in the modulation of calcineurin signaling
	ENSP00000353224	https://www.uniprot.org/uniprot/P02786	TFRC	x				Cellular uptake of iron occurs via receptor-mediated endocytosis of ligand-occupied transferrin receptor into specialized endosomes; endosomal acidification leads to iron release
	ENSP00000354837	https://www.uniprot.org/uniprot/Q92974	ARHGEF2					Activates Rho-GTPases by promoting the exchange of GDP for GTP; may be involved in epithelial barrier permeability, cell motility and polarization, dendritic spine morphology, antigen presentation, leukemic cell differentiation, cell cycle regulation, innate immune response, and cancer; immune system		Microtubule binding
	ENSP00000354947	https://www.uniprot.org/uniprot/P47755	CAPZA2					F-actin-capping proteins bind in a Ca2+-independent manner to the fast growing ends of actin filaments (barbed end)		Actin filament capping
	ENSP00000356425	https://www.uniprot.org/uniprot/Q9Y5K5	UCHL5	x				Protease that specifically cleaves 'Lys-48'-linked polyubiquitin chains; deubiquitinating enzyme associated with the 19S regulatory subunit of the 26S proteasome
	ENSP00000356771	https://www.uniprot.org/uniprot/P12259	F5					Central regulator of hemostasis; it serves as a critical cofactor for the prothrombinase activity of factor Xa that results in the activation of prothrombin to thrombin
	ENSP00000357066	https://www.uniprot.org/uniprot/P05089	ARG1					Key element of the urea cycle converting L-arginine to urea and L-ornithine, which is further metabolized into metabolites proline and polyamides that drive collagen synthesis and bioenergetic pathways critical for cell proliferation; arginine metabolism is a critical regulator of innate and adaptive immune responses
	ENSP00000357283	https://www.uniprot.org/uniprot/P02545	LMNA					Lamins are components of the nuclear lamina, a fibrous layer on the nucleoplasmic side of the inner nuclear membrane, which is thought to provide a framework for the nuclear envelope and may also interact with chromatin; plays an important role in nuclear assembly, chromatin organization, nuclear membrane and telomere dynamics; it acts to disrupt mitosis and induce DNA damage in vascular smooth m…
	ENSP00000359976	https://www.uniprot.org/uniprot/P32929	CTH					Lyase; catalyzes the last step in the trans-sulfuration pathway from methionine to cysteine; has broad substrate specificity; converts cystathionine to cysteine, ammonia and 2-oxobutanoate; converts two cysteine molecules to lanthionine and hydrogen sulfide; can also accept homocysteine as substrate.		Calmodulin binding
	ENSP00000360290	https://www.uniprot.org/uniprot/P54646	PRKAA2		x	x		Catalytic subunit of AMP-activated protein kinase (AMPK), an energy sensor protein kinase that plays a key role in regulating cellular energy metabolism; in response to reduction of intracellular ATP levels, AMPK activates energy-producing pathways and inhibits energy-consuming processes; inhibits protein, carbohydrate and lipid biosynthesis, as well as cell growth and proliferation; also acts as…
	ENSP00000361666	https://www.uniprot.org/uniprot/Q9Y694	SLC22A7		x	x		Mediates sodium-independent multispecific organic anion transport; transport of prostaglandin E2, prostaglandin F2, tetracycline, bumetanide, estrone sulfate, glutarate, dehydroepiandrosterone sulfate, allopurinol, 5-fluorouracil, paclitaxel, L-ascorbic acid, salicylate, ethotrexate, and alpha-ketoglutarate
	ENSP00000366244	https://www.uniprot.org/uniprot/P10398	ARAF		x			Kinase; involved in the transduction of mitogenic signals from the cell membrane to the nucleus; may also regulate the TOR signaling cascade
	ENSP00000370023	https://www.uniprot.org/uniprot/P40939	HADHA					Mitochondrial trifunctional enzyme catalyzes the last three of the four reactions of the mitochondrial beta-oxidation pathway; It acylates monolysocardiolipin into cardiolipin, a major mitochondrial membrane phospholipid which plays a key role in apoptosis and supports mitochondrial respiratory chain complexes in the generation of ATP
	ENSP00000377303	https://www.uniprot.org/uniprot/P51606	RENBP					Epimerase; catalyzes the interconversion of N-acetylglucosamine to N-acetylmannosamine; binds to renin forming a protein complex called high molecular weight (HMW) renin and inhibits renin activity; involved in the N-glycolylneuraminic acid (Neu5Gc) degradation pathway: although human is not able to catalyze formation of Neu5Gc due to the inactive CMAHP enzyme, Neu5Gc is present in food and must …
	ENSP00000377833	https://www.uniprot.org/uniprot/P09525	ANXA4	x				Calcium/phospholipid-binding protein which promotes membrane fusion and is involved in exocytosis
	ENSP00000379895	https://www.uniprot.org/uniprot/P50440	GATM					Aminotransferase, mitochondrial; catalyzes the biosynthesis of guanidinoacetate, the immediate precursor of creatine; creatine plays a vital role in energy metabolism in muscle tissues; may play a role in embryonic and central nervous system development
	ENSP00000384708	https://www.uniprot.org/uniprot/P23945	FSHR		x	x	x	G protein-coupled receptor for follitropin, the follicle-stimulating hormone; through cAMP production activates the downstream PI3K-AKT and ERK1/ERK2 signaling pathways		Spermatogenesis; male gonad development; regulation of protein kinase A signaling
	ENSP00000414303	https://www.uniprot.org/uniprot/P23560	BDNF		x			Important signaling molecule that activates signaling cascades downstream of NTRK2; during development, promotes the survival and differentiation of selected neuronal populations of the peripheral and central nervous systems		Growth factor activity; circadian rythm; extracellular space
	ENSP00000419027	https://www.uniprot.org/uniprot/P05166	PCCB					Carboxlase; mitochondrial; this is one of the 2 subunits of the biotin-dependent propionyl-CoA carboxylase (PCC), a mitochondrial enzyme involved in the catabolism of odd chain fatty acids, branched-chain amino acids isoleucine, threonine, methionine, and valine and other metabolites
	ENSP00000430269	https://www.uniprot.org/uniprot/P34913	EPHX2					Bifunctional enzyme; the C-terminal domain has epoxide hydrolase activity and acts on epoxides (alkene oxides, oxiranes) and arene oxides; the N-terminal domain has lipid phosphatase activity
	ENSP00000445175	https://www.uniprot.org/uniprot/P00338	LDHA					Symbol + GO -> Dehydrogenase		L-lactate dehydrogenase activity glycolytic process; post-embryonic animal organ development
	ENSP00000463999	https://www.uniprot.org/uniprot/Q96GD4	AURKB					Serine/threonine-protein kinase component of the chromosomal passenger complex (CPC), a complex that acts as a key regulator of mitosis; the CPC complex has essential functions at the centromere in ensuring correct chromosome alignment and segregation and is required for chromatin-induced microtubule stabilization and spindle assembly; involved in the bipolar attachment of spindle microtubules to…
			NX	6	14	8	4

## Sheet: BODY1
Supplementary Table S5. UniProtKB annotations relating to the functions of the proteins in all six sets
For details on parameter inference, see Materials and Methods.
BODY1 sample
								UniProtKB visited at 11th of May 2020
	Protein Stable ID	UniProtKB functional annotation	Gene name	exocyt+endocyt+vesic+lysosom+proteasom+exocr+secern+secret	signal+cytokin (inkl. references to hormonal signaling; excl. cytokinesis)	hormon+andro+follicl+estro+prosta+insul+cortico+steroid+testost+endocr (excl. follicle development)	spermato+acrosom+test (excl. testost)	Function (according to UniProtKB and symbol/name)		GO - Molecular Function
	ENSP00000162749	https://www.uniprot.org/uniprot/P19438	TNFRSF1A					Apoptosis
	ENSP00000169298	https://www.uniprot.org/uniprot/P15907	ST6GAL1					Sialyltransferase; transfers sialic acid from CMP-sialic acid to galactose-containing acceptor substrates
	ENSP00000224237	https://www.uniprot.org/uniprot/P08670	VIM					Vimentins are class-III intermediate filaments found in various non-epithelial cells, especially mesenchymal cells; vimentin is attached to the nucleus, endoplasmic reticulum, and mitochondria, either laterally or terminally
	ENSP00000230792	https://www.uniprot.org/uniprot/Q9BQG2	NUDT12					Pyrophosphatase; peroxisome; hydrolyzes NAD(P)H to NMNH and AMP (2',5'-ADP), and diadenosine diphosphate to AMP; has also activity towards NAD(P)+, ADP-ribose and diadenosine triphosphate
	ENSP00000238714	https://www.uniprot.org/uniprot/Q9BWT3	PAPOLG		x			Poly-(A) polymerase; responsible for the post-transcriptional adenylation of the 3'-terminal of mRNA precursors and several small RNAs including signal recognition particle (SRP) RNA, nuclear 7SK RNA, U2 small nuclear RNA, and ribosomal 5S RNA
	ENSP00000246802	https://www.uniprot.org/uniprot/Q9NZM5	NOP53					Nucleolar protein which is involved in the integration of the 5S RNP into the ribosomal large subunit during ribosome biogenesis; nuclear sensor to stress response including DNA damage or perturbation of ribosome biogenesis; may be involved in cell proliferation and apoptosis; may be involved in cellular respiration
	ENSP00000250974	https://www.uniprot.org/uniprot/Q96GS6	ABHD17A					Hydrolyzes fatty acids from S-acylated cysteine residues in proteins; has depalmitoylating activity towards several substrates
	ENSP00000252456	https://www.uniprot.org/uniprot/P51911	CNN1					Thin filament-associated protein that is implicated in the regulation and modulation of smooth muscle contraction; it is capable of binding to actin, calmodulin, troponin C and tropomyosin
	ENSP00000252854	https://www.uniprot.org/uniprot/Q99784	OLFM1					Contributes to the regulation of axonal growth in the embryonic and adult central nervous system; may be required for normal responses to olfactory stimuli
	ENSP00000256652	https://www.uniprot.org/uniprot/Q93033	CD101					Immune system
	ENSP00000258281	https://www.uniprot.org/uniprot/O75529	TAF5L					Histone acetylation; somatic reprogramming		Regulation of somatic stem cell population maintenance
	ENSP00000258403	https://www.uniprot.org/uniprot/Q9BZV2	SLC19A3					Mediates high affinity thiamine uptake
	ENSP00000259748	https://www.uniprot.org/uniprot/O43559	FRS3		x			Signaling		Fibroblast growth factor receptor binding
	ENSP00000260010	https://www.uniprot.org/uniprot/O60603	TLR2					Immune system
	ENSP00000261835	https://www.uniprot.org/uniprot/Q9Y6A2	CYP46A1					P450 monooxygenase that plays a major role in cholesterol homeostasis in the brain; primarily catalyzes the hydroxylation (with S stereochemistry) at C-24 of cholesterol side chain, triggering cholesterol diffusion out of neurons and its further degradation
	ENSP00000261839	https://www.uniprot.org/uniprot/Q9NQX4	MYO5C					May be involved in transferrin trafficking; likely to power actin-based membrane trafficking in many physiologically crucial tissues
	ENSP00000263468	https://www.uniprot.org/uniprot/Q9P2H0	CEP126					Participates in cytokinesis; necessary for microtubules and mitotic spindle organization; involved in primary cilium formation
	ENSP00000264499	https://www.uniprot.org/uniprot/Q8IWZ6	BBS7					The BBSome complex is thought to function as a coat complex required for sorting of specific membrane proteins to the primary cilia; the BBSome complex is required for ciliogenesis		Cilium assembly
	ENSP00000265465	https://www.uniprot.org/uniprot/Q14181	POLA2					Accessory subunit of the DNA polymerase alpha complex (also known as the alpha DNA polymerase-primase complex) which plays an essential role in the initiation of DNA synthesis
	ENSP00000265560	https://www.uniprot.org/uniprot/Q13107	USP4					Hydrolase; deubiquitinating enzyme that removes conjugated ubiquitin from target proteins
	ENSP00000267064	https://www.uniprot.org/uniprot/Q8TAQ2	SMARCC2					Component of SWI/SNF chromatin remodeling complexes that carry out key enzymatic activities, changing chromatin structure by altering DNA-histone contacts within a nucleosome in an ATP-dependent manner; involved in transcriptional activation and repression of select genes by chromatin remodeling (alteration of DNA-nucleosome topology)		Nervous system development; chromatin remodeling
	ENSP00000269391	https://www.uniprot.org/uniprot/Q96PX1	RNF157		x			E3 ubiquitin ligase that ubiquitinates APBB1 for its degradation and thus prevents apoptosis and promotes survival of neurons; dendrite growth and maintenance; downstream effector of the interconnected PI3K and MAPK signaling pathways; participating in the regulation of the cell cycle
	ENSP00000272519	https://www.uniprot.org/uniprot/P11234	RALB					Multifunctional GTPase involved in a variety of cellular processes including gene expression, cell migration, cell proliferation, oncogenic transformation and membrane trafficking; repression of apoptosis
	ENSP00000272732	https://www.uniprot.org/uniprot/Q0VDG4	SCRN3					GO -> Dipeptidase		Dipeptidase activity
	ENSP00000274498	https://www.uniprot.org/uniprot/Q9UNA1	ARHGAP26		x			GTPase-activating protein for RHOA and CDC42		Cytoskeleton; signaling
	ENSP00000280362	https://www.uniprot.org/uniprot/Q03393	PTS					Synthase; involved in the biosynthesis of tetrahydrobiopterin, an essential cofactor of aromatic amino acid hydroxylases
	ENSP00000295934	https://www.uniprot.org/uniprot/Q9UBX0	HESX1					Required for the normal development of the forebrain, eyes and other anterior structures such as the olfactory placodes and pituitary gland
	ENSP00000296543	https://www.uniprot.org/uniprot/Q9BXJ9	NAA15					Auxillary subunit of the N-terminal acetyltransferase A (NatA) complex which displays alpha (N-terminal) acetyltransferase activity
	ENSP00000296824	https://www.uniprot.org/uniprot/Q96BQ5	CCDC127
	ENSP00000297265	https://www.uniprot.org/uniprot/Q96CF2	CHMP4C	x				Probable core component of the endosomal sorting required for transport complex III (ESCRT-III) which is involved in multivesicular bodies (MVBs) formation and sorting of endosomal cargo proteins into MVBs
	ENSP00000300108	https://www.uniprot.org/uniprot/Q9UHF0	TAC3	x	x			Tachykinins are active peptides which excite neurons, evoke behavioral responses, are potent vasodilators and secretagogues, and contract (directly or indirectly) many smooth muscles; is a critical central regulator of gonadal function		Signaling; female pregnancy
	ENSP00000302276	https://www.uniprot.org/uniprot/Q96MH2	HEXIM2					Transcriptional regulator which functions as a general RNA polymerase II transcription inhibitor
	ENSP00000304108	https://www.uniprot.org/uniprot/Q6P995	FAM171B
	ENSP00000306561	https://www.uniprot.org/uniprot/O15527	OGG1					DNA repair enzyme that incises DNA at 8-oxoG residues
	ENSP00000306968	https://www.uniprot.org/uniprot/Q9BWT1	CDCA7					Participates in MYC-mediated cell transformation and apoptosis; induces anchorage-independent growth and clonogenicity in lymphoblastoid cells
	ENSP00000307046	https://www.uniprot.org/uniprot/P34741	SDC2					Cell surface proteoglycan that bears heparan sulfate; regulates dendritic arbor morphogenesis
	ENSP00000307607	https://www.uniprot.org/uniprot/Q8N3Y7	SDR16C5					enzyme; oxidoreductase with strong preference for NAD
	ENSP00000308944	https://www.uniprot.org/uniprot/Q14527	HLTF					Has both helicase and E3 ubiquitin ligase activities
	ENSP00000309576	https://www.uniprot.org/uniprot/O00214	LGALS8					Beta-galactoside-binding lectin that acts as a sensor of membrane damage caused by infection by targeting pathogens for autophagy
	ENSP00000310036	https://www.uniprot.org/uniprot/P28906	CD34		x			Possible adhesion molecule with a role in early hematopoiesis by mediating the attachment of stem cells to the bone marrow extracellular matrix or directly to stromal cells		Regulation of immune respone; signal transduction
	ENSP00000310406	https://www.uniprot.org/uniprot/Q13671	RIN1		x			Ras effector protein, which may serve as an inhibitory modulator of neuronal plasticity in aversive memory formation; can affect Ras signaling at different levels
	ENSP00000312286	https://www.uniprot.org/uniprot/P04054	PLA2G1B		x			Phospholipase; PA2 catalyzes the calcium-dependent hydrolysis of the 2-acyl groups in 3-sn-phosphoglycerides, this releases glycerophospholipids and arachidonic acid that serve as the precursors of signal molecules
	ENSP00000313983	https://www.uniprot.org/uniprot/Q9BZ95	NSD3					Histone methyltransferase
	ENSP00000315410	https://www.uniprot.org/uniprot/Q9H4L5	OSBPL3					Phosphoinositide-binding protein which associates with both cell and endoplasmic reticulum (ER) membranes
	ENSP00000315602	https://www.uniprot.org/uniprot/P32297	CHRNA3					After binding acetylcholine, the AChR responds by an extensive change in conformation that affects all subunits and leads to opening of an ion-conducting channel across the plasma membrane; nervous system
	ENSP00000316578	https://www.uniprot.org/uniprot/Q15022	SUZ12					Polycomb group (PcG) protein; component of the PRC2/EED-EZH2 complex, which methylates 'Lys-9' (H3K9me) and 'Lys-27' (H3K27me) of histone H3, leading to transcriptional repression of the affected target gene
	ENSP00000319169	https://www.uniprot.org/uniprot/O14744	PRMT5		x		x	Arginine methyltransferase that can both catalyze the formation of omega-N monomethylarginine (MMA) and symmetrical dimethylarginine (sDMA), with a preference for the formation of MMA; methylates the Piwi proteins (PIWIL1, PIWIL2 and PIWIL4), methylation of Piwi proteins being required for the interaction with Tudor domain-containing proteins and subsequent localization to the meiotic nuage; invo…
	ENSP00000320176	https://www.uniprot.org/uniprot/P14317	HCLS1		x			Substrate of the antigen receptor-coupled tyrosine kinase; plays a role in antigen receptor signaling for both clonal expansion and deletion in lymphoid cells; immune system
	ENSP00000322915	https://www.uniprot.org/uniprot/Q5VZL5	ZMYM4					Transcription factor playing a role in the regulation of cell morphology and cytoskeletal organization		DNA-binding transcription factor activity, RNA polymerase II-specific
	ENSP00000327025	https://www.uniprot.org/uniprot/P51449	RORC		x	x		Nuclear receptor; key regulator of cellular differentiation, immunity, peripheral circadian rhythm as well as lipid, steroid, xenobiotics and glucose metabolism		DNA-binding transcription factor activity
	ENSP00000329735	https://www.uniprot.org/uniprot/Q96EL1	INKA1					Inhibitor of the serine/threonine-protein kinase PAK4; acts by binding PAK4 in a substrate-like manner, inhibiting the protein kinase activity
	ENSP00000330523	https://www.uniprot.org/uniprot/Q96CG8	CTHRC1					May act as a negative regulator of collagen matrix deposition
	ENSP00000332716	https://www.uniprot.org/uniprot/Q8IWP9	CCDC28A
	ENSP00000337998	https://www.uniprot.org/uniprot/Q9HCH0	NCKAP5L					Regulates microtubule organization and stabilization; promotes microtubule growth and bundling formation and stabilizes microtubules by increasing intense acetylation of microtubules
	ENSP00000338352	https://www.uniprot.org/uniprot/Q9NZJ9	NUDT4		x			Phosphohydrolase; cleaves a beta-phosphate from the diphosphate groups in PP-InsP5 (diphosphoinositol pentakisphosphate), PP-InsP4 and [PP]2-InsP4 (bisdiphosphoinositol tetrakisphosphate), suggesting that it may play a role in signal transduction
	ENSP00000343463	https://www.uniprot.org/uniprot/Q9Y2U5	MAP3K2		x			Kinase; component of a protein kinase signal transduction cascade
	ENSP00000343785	https://www.uniprot.org/uniprot/O43609	SPRY1					May function as an antagonist of fibroblast growth factor (FGF) pathways and may negatively modulate respiratory organogenesis		Animal organ development; establishment of mitotic spindle orientation
	ENSP00000346508	https://www.uniprot.org/uniprot/P04085	PDGFA				x	Growth factor that plays an essential role in the regulation of embryonic development, cell proliferation, cell migration, survival and chemotaxis; potent mitogen for cells of mesenchymal origin; required for normal lung alveolar septum formation during embryogenesis, normal development of the gastrointestinal tract, normal development of Leydig cells and spermatogenesis
	ENSP00000351422	https://www.uniprot.org/uniprot/Q96EN9	REX1BD
	ENSP00000352561	https://www.uniprot.org/uniprot/P30988	CALCR					This is a receptor for calcitonin		Axon
	ENSP00000352841	https://www.uniprot.org/uniprot/Q8IYX8	CEP57L1					Centrosomal protein which may be required for microtubule attachment to centrosomes
	ENSP00000353679	https://www.uniprot.org/uniprot/P08473	MME					Enzyme; thermolysin-like specificity		Endopeptidase activity; neuron projection terminus
	ENSP00000354900	https://www.uniprot.org/uniprot/P08034	GJB1					One gap junction consists of a cluster of closely packed pairs of transmembrane channels, the connexons, through which materials of low MW diffuse from one cell to a neighboring cell		Cell communication
	ENSP00000354911	https://www.uniprot.org/uniprot/Q96CG3	TIFA		x			Immune system; adapter molecule that plays a key role in the activation of proinflammatory NF-kappa-B signaling
	ENSP00000355938	https://www.uniprot.org/uniprot/Q9Y5Y0	FLVCR1					Heme transporter that exports cytoplasmic heme		Mitochondrion
	ENSP00000360107	https://www.uniprot.org/uniprot/Q5JVL4	EFHC1					Microtubule-associated protein which regulates cell division and neuronal migration during cortical development		Cilium-dependent motility; mitotic spindle organization; axoneme; regulation of cell division
	ENSP00000360464	https://www.uniprot.org/uniprot/Q8N5F7	NKAP					Acts as a transcriptional repressor		Stem cell population maintenance
	ENSP00000362590	https://www.uniprot.org/uniprot/Q9NU19	TBC1D22B					May act as a GTPase-activating protein for Rab family protein(s)
	ENSP00000365569	https://www.uniprot.org/uniprot/O75955	FLOT1	x				May act as a scaffolding protein within caveolar membranes, functionally participating in formation of caveolae or caveolae-like vesicles
	ENSP00000369895	https://www.uniprot.org/uniprot/Q9NWZ8	GEMIN8					The SMN complex plays a catalyst role in the assembly of small nuclear ribonucleoproteins (snRNPs), the building blocks of the spliceosome
	ENSP00000372361	https://www.uniprot.org/uniprot/Q9UJ78	ZMYM5					Functions as a transcriptional regulator
	ENSP00000376204	https://www.uniprot.org/uniprot/Q9NR48	ASH1L					Histone methyltransferase specifically trimethylating 'Lys-36' of histone H3 forming H3K36me3
	ENSP00000378735	https://www.uniprot.org/uniprot/O75061	DNAJC6	x				Phosphatase; recruits HSPA8/HSC70 to clathrin-coated vesicles and promotes uncoating of clathrin-coated vesicles; plays a role in clathrin-mediated endocytosis in neurons
	ENSP00000382508	https://www.uniprot.org/uniprot/Q9H305	CDIP1					Acts as an important p53/TP53-apoptotic effector
	ENSP00000425133	https://www.uniprot.org/uniprot/Q92540	SMG7					Plays a role in nonsense-mediated mRNA decay; recruits UPF1 to cytoplasmic mRNA decay bodies; together with SMG5 is thought to provide a link to the mRNA degradation machinery involving exonucleolytic pathways
	ENSP00000432768	https://www.uniprot.org/uniprot/Q14008	CKAP5					Acts as processive microtubule polymerase; promotes cytoplasmic microtubule nucleation and elongation; plays a major role in organizing spindle poles		G2/M transition of mitotic cell cycle
	ENSP00000440704	https://www.uniprot.org/uniprot/Q8IYJ3	SYTL1	x				May play a role in vesicle trafficking
			NX	5	14	1	2

## Sheet: BODY2
Supplementary Table S5. UniProtKB annotations relating to the functions of the proteins in all six sets
For details on parameter inference, see Materials and Methods.
BODY2 sample
								UniProtKB visited at 11th of May 2020
	Protein Stable ID	UniProtKB functional annotation	Gene name	exocyt+endocyt+vesic+lysosom+proteasom+exocr+secern+secret	signal+cytokin (inkl. references to hormonal signaling; excl. cytokinesis)	hormon+andro+follicl+estro+prosta+insul+cortico+steroid+testost+endocr (excl. follicle development)	spermato+acrosom+test (excl. testost)	Function (according to UniProtKB and symbol/name)		GO - Molecular Function
	ENSP00000005386	https://www.uniprot.org/uniprot/Q9H6T3	RPAP3					Forms an interface between the RNA polymerase II enzyme and chaperone/scaffolding protein, suggesting that it is required to connect RNA polymerase II to regulators of protein complex formation
	ENSP00000027335	https://www.uniprot.org/uniprot/Q12864	CDH17					Cadherins are calcium-dependent cell adhesion proteins; they preferentially interact with themselves in a homophilic manner in connecting cells; cadherins may thus contribute to the sorting of heterogeneous cell types
	ENSP00000216923	https://www.uniprot.org/uniprot/Q9NTW7	ZFP64					May be involved in transcriptional regulation
	ENSP00000217133	https://www.uniprot.org/uniprot/Q9H4B7	TUBB1					Tubulin is the major constituent of microtubules
	ENSP00000217233	https://www.uniprot.org/uniprot/Q96RU7	TRIB3		x	x		Disrupts insulin signaling by binding directly to Akt kinases and blocking their activation; inhibits transcriptional activation activity of certain proteins
	ENSP00000225941	https://www.uniprot.org/uniprot/Q9P2A4	ABI3					May inhibit tumor metastasis; in vitro, reduces cell motility
	ENSP00000228510	https://www.uniprot.org/uniprot/Q03426	MVK					Kinase; catalyzes the phosphorylation of mevalonate to mevalonate 5-phosphate, a key step in isoprenoid and cholesterol biosynthesis
	ENSP00000229214	https://www.uniprot.org/uniprot/Q13601	KRR1					Required for 40S ribosome biogenesis
	ENSP00000237654	https://www.uniprot.org/uniprot/Q14094	CCNI				x			Spermatogenesis
	ENSP00000238616	https://www.uniprot.org/uniprot/Q8TD19	NEK9					Kinase; pleiotropic regulator of mitotic progression, participating in the control of spindle dynamics and chromosome separation
	ENSP00000238788	https://www.uniprot.org/uniprot/Q6NUQ4	TMEM214					Critical mediator, in cooperation with CASP4, of endoplasmic reticulum-stress induced apoptosis
	ENSP00000246785	https://www.uniprot.org/uniprot/Q9HB09	BCL2L12					Cell cycle		p53 binding
	ENSP00000246957	https://www.uniprot.org/uniprot/Q12931	TRAP1					Chaperone that expresses an ATPase activity; involved in maintaining mitochondrial function and polarization, downstream of PINK1 and mitochondrial complex I; is a negative regulator of mitochondrial respiration able to modulate the balance between oxidative phosphorylation and aerobic glycolysis
	ENSP00000258198	https://www.uniprot.org/uniprot/O43237	DYNC1LI2					Acts as one of several non-catalytic accessory components of the cytoplasmic dynein 1 complex that are thought to be involved in linking dynein to cargos and to adapter proteins that regulate dynein function
	ENSP00000259089	https://www.uniprot.org/uniprot/P51451	BLK		x			Non-receptor tyrosine kinase involved in B-lymphocyte development, differentiation and signaling; immune system
	ENSP00000260502	https://www.uniprot.org/uniprot/O75815	BCAR3		x	x		Acts as an adapter protein downstream of several growth factor receptors to promote cell proliferation, migration, and redistribution of actin fibers; specifically involved in INS/insulin signaling pathway		Signal transduction
	ENSP00000260570	https://www.uniprot.org/uniprot/Q9UG01	IFT172		x			Required for the maintenance and formation of cilia; plays an indirect role in hedgehog (Hh) signaling
	ENSP00000262039	https://www.uniprot.org/uniprot/Q8NEB9	PIK3C3					Kinase catalytic subunit of the PI3K complex that mediates formation of phosphatidylinositol 3-phosphate
	ENSP00000262094	https://www.uniprot.org/uniprot/O00194	RAB27B	x				Small GTPase which cycles between active GTP-bound and inactive GDP-bound states; in its active state, binds to a variety of effector proteins to regulate homeostasis of late endocytic pathway, including endosomal positioning, maturation and secretion; axon
	ENSP00000262213	https://www.uniprot.org/uniprot/Q15629	TRAM1	x	x			Stimulatory or required for the translocation of secretory proteins across the ER membrane		Signaling receptor activity
	ENSP00000264144	https://www.uniprot.org/uniprot/Q13753	LAMC2					Binding to cells via a high affinity receptor, laminin is thought to mediate the attachment, migration and organization of cells into tissues during embryonic development by interacting with other extracellular matrix components		Animal organ development; dendrite development; motor neuron axon guidance
	ENSP00000264670	https://www.uniprot.org/uniprot/Q08J23	NSUN2				x	RNA cytosine C5-methyltransferase that methylates cytosine to 5-methylcytosine (m5C) in various RNAs, such as tRNAs, mRNAs and some long non-coding RNAs; testis differentiation
	ENSP00000264711	https://www.uniprot.org/uniprot/Q9NZQ0	DNAJC27					GTPase which can activate the MEK/ERK pathway and induce cell transformation when overexpressed
	ENSP00000264867	https://www.uniprot.org/uniprot/Q9UBK2	PPARGC1A		x	x		Transcriptional coactivator for steroid receptors and nuclear receptors; greatly increases the transcriptional activity of PPARG and thyroid hormone receptor on the uncoupling protein promoter; mitochondrion		Circadian rhythm; mitochondrion organization; androgen receptor activity; diverse GOs relating to musculature, nervous system, thermoregulation, oxidative stress, etc.
	ENSP00000265036	https://www.uniprot.org/uniprot/Q8WUY9	DEPDC1B							GTPase activator activity
	ENSP00000266126	https://www.uniprot.org/uniprot/P49770	EIF2B2					Catalyzes the exchange of eukaryotic initiation factor 2-bound GDP for GTP		Ovarian follicle development
	ENSP00000275732	https://www.uniprot.org/uniprot/O75420	GIGYF1		x			May act cooperatively with GRB10 to regulate tyrosine kinase receptor signaling
	ENSP00000300026	https://www.uniprot.org/uniprot/P23284	PPIB					Isomerase; PPIase that catalyzes the cis-trans isomerization of proline imidic peptide bonds in oligopeptides and may therefore assist protein folding
	ENSP00000300417	https://www.uniprot.org/uniprot/Q6UWE0	LRSAM1	x				E3 ubiquitin-protein ligase that mediates monoubiquitination of TSG101 at multiple sites, leading to inactivate the ability of TSG101 to sort endocytic (EGF receptors) and exocytic (HIV-1 viral proteins) cargos
	ENSP00000300571	https://www.uniprot.org/uniprot/Q9NZH0	GPRC5B							G protein-coupled receptor activity
	ENSP00000300650	https://www.uniprot.org/uniprot/Q8ND24	RNF214
	ENSP00000303252	https://www.uniprot.org/uniprot/Q7Z570	ZNF804A							GOs relating to neurons and microtubule
	ENSP00000305524	https://www.uniprot.org/uniprot/Q9BSV6	TSEN34					Constitutes one of the two catalytic subunit of the tRNA-splicing endonuclease complex, a complex responsible for identification and cleavage of the splice sites in pre-tRNA
	ENSP00000308549	https://www.uniprot.org/uniprot/P30542	ADORA1		x			Receptor for adenosine; the activity of this receptor is mediated by G proteins which inhibit adenylyl cyclase		GOs relating to nervous system, inflammation, musculature, signaling, hypoxia, circadian rhythm, glomerula
	ENSP00000308576	https://www.uniprot.org/uniprot/O00212	RHOD					Involved in endosome dynamics; may coordinate membrane transport with the function of the cytoskeleton; participates in the reorganization of actin cytoskeleton
	ENSP00000314420	https://www.uniprot.org/uniprot/O15534	PER1					Transcriptional repressor which forms a core component of the circadian clock
	ENSP00000318472	https://www.uniprot.org/uniprot/P13591	NCAM1					This protein is a cell adhesion molecule involved in neuron-neuron adhesion, neurite fasciculation, outgrowth of neurites, etc.
	ENSP00000323183	https://www.uniprot.org/uniprot/Q8N680	ZBTB2					May be involved in transcriptional regulation
	ENSP00000325526	https://www.uniprot.org/uniprot/O96014	WNT11		x			Ligand for members of the frizzled family of seven transmembrane receptors; probable developmental protein; may be a signaling molecule		Wnt signaling pathway; multicellular organism development, negative regulation of cell death; GOs relating to musculature and nervous system (development)
	ENSP00000340874	https://www.uniprot.org/uniprot/Q06413	MEF2C					Transcription activator which binds specifically to the MEF2 element present in the regulatory regions of many muscle-specific genes; controls cardiac morphogenesis and myogenesis, and is also involved in vascular development; crucial for normal neuronal development, distribution, and electrical activity in the neocortex; immune system
	ENSP00000348043	https://www.uniprot.org/uniprot/Q8TCA0	LRRC20
	ENSP00000353735	https://www.uniprot.org/uniprot/Q9NS56	TOPORS					Functions as an E3 ubiquitin-protein ligase and as an E3 SUMO1-protein ligase; probable tumor suppressor involved in cell growth, cell proliferation and apoptosis that regulates p53/TP53 stability through ubiquitin-dependent degradation		GOs relating to ubiquitination, basal body and centriole
	ENSP00000355927	https://www.uniprot.org/uniprot/Q96S38	RPS6KC1					Kinase; may be involved in transmitting sphingosine-1 phosphate (SPP)-mediated signaling into the cell
	ENSP00000356134	https://www.uniprot.org/uniprot/Q8WVM0	TFB1M					S-adenosyl-L-methionine-dependent methyltransferase which specifically dimethylates mitochondrial 12S rRNA at the conserved stem loop; also required for basal transcription of mitochondrial DNA
	ENSP00000356218	https://www.uniprot.org/uniprot/Q9UHQ9	CYB5R1					NADH-cytochrome b5 reductases are involved in desaturation and elongation of fatty acids, cholesterol biosynthesis, drug metabolism, and, in erythrocyte, methemoglobin reduction		Mitochondrion
	ENSP00000356832	https://www.uniprot.org/uniprot/O00141	SGK1					Serine/threonine-protein kinase which is involved in the regulation of a wide variety of ion channels, membrane transporters, cellular enzymes, transcription factors, neuronal excitability, cell growth, proliferation, survival, migration and apoptosis
	ENSP00000358770	https://www.uniprot.org/uniprot/Q9H2G2	SLK					Mediates apoptosis and actin stress fiber dissolution
	ENSP00000360998	https://www.uniprot.org/uniprot/Q5VYY1	ANKRD22
	ENSP00000361433	https://www.uniprot.org/uniprot/Q13868	EXOSC2					Non-catalytic component of the RNA exosome complex which has 3'->5' exoribonuclease activity and participates in a multitude of cellular RNA processing and degradation events
	ENSP00000361536	https://www.uniprot.org/uniprot/Q9BW60	ELOVL1					Enzyme; catalyzes the first and rate-limiting reaction of the four reactions that constitute the long-chain fatty acids elongation cycle; endoplasmic reticulum-bound enzymatic process
	ENSP00000364475	https://www.uniprot.org/uniprot/P09467	FBP1	x	x	x		Bisphosphatase; catalyzes the hydrolysis of fructose 1,6-bisphosphate to fructose 6-phosphate in the presence of divalent cations, acting as a rate-limiting enzyme in gluconeogenesis; plays a role in regulating glucose sensing and insulin secretion of pancreatic beta-cells
	ENSP00000369150	https://www.uniprot.org/uniprot/Q2T9L4	INSYN1					Component of the protein machinery at the inhibitory synapses, probably acting as a scaffold
	ENSP00000369979	https://www.uniprot.org/uniprot/Q96SM3	CPXM1					May be involved in cell-cell interactions; no carboxypeptidase activity was found yet (enzyme?)
	ENSP00000373340	https://www.uniprot.org/uniprot/P55201	BRPF1					Enzyme; scaffold subunit of various histone acetyltransferase (HAT) complexes
	ENSP00000374219	https://www.uniprot.org/uniprot/Q96BT7	ALKBH8					Enzyme; catalyzes the methylation of 5-carboxymethyl uridine to 5-methylcarboxymethyl uridine at the wobble position of the anticodon loop in tRNA via its methyltransferase domain
	ENSP00000374443	https://www.uniprot.org/uniprot/Q99698	LYST	x				May be required for sorting endosomal resident proteins into late multivesicular endosomes by a mechanism involving microtubules
	ENSP00000375892	https://www.uniprot.org/uniprot/P31751	AKT2		x			Kinase; AKT2 is one of 3 closely related serine/threonine-protein kinases (AKT1, AKT2 and AKT3) called the AKT kinase, and which regulate many processes including metabolism, proliferation, cell survival, growth and angiogenesis; signaling
	ENSP00000377547	https://www.uniprot.org/uniprot/Q8IV13	CCNJL							Mitotic cell cycle phase transition
	ENSP00000378324	https://www.uniprot.org/uniprot/Q8WW22	DNAJA4							Chaperone binding and GOs relating to transcription (gene expression)
	ENSP00000380247	https://www.uniprot.org/uniprot/P35367	HRH1					In peripheral tissues, the H1 subclass of histamine receptors mediates the contraction of smooth muscles, increase in capillary permeability due to contraction of terminal venules, and catecholamine release from adrenal medulla, as well as mediating neurotransmission in the central nervous system
	ENSP00000381237	https://www.uniprot.org/uniprot/Q8TCT9	HM13		x			Enzyme; catalyzes intramembrane proteolysis of some signal peptides after they have been cleaved from a preprotein, resulting in the release of the fragment from the ER membrane into the cytoplasm; immune system; signaling
	ENSP00000381970	https://www.uniprot.org/uniprot/Q9NXP7	GIN1					Symbol -> Enzyme?		DNA integration
	ENSP00000382791	https://www.uniprot.org/uniprot/P39086	GRIK1					Ionotropic glutamate receptor; L-glutamate acts as an excitatory neurotransmitter at many synapses in the central nervous system
	ENSP00000385083	https://www.uniprot.org/uniprot/Q06136	KDSR					Reductase; catalyzes the reduction of 3-ketodihydrosphingosine (KDS) to dihydrosphingosine (DHS)
	ENSP00000386076	https://www.uniprot.org/uniprot/Q96NT3	GUCD1
	ENSP00000389934	https://www.uniprot.org/uniprot/A0A0A0MSI8	EXOC5
	ENSP00000393557	https://www.uniprot.org/uniprot/Q9Y6R1	SLC4A4					Electrogenic sodium/bicarbonate cotransporter with a Na+:HCO3-stoichiometry varying from 1:2 to 1:3; may regulate bicarbonate influx/efflux at the basolateral membrane of cells and regulate intracellular pH
	ENSP00000397181	https://www.uniprot.org/uniprot/P49798	RGS4		x			Inhibits signal transduction by increasing the GTPase activity of G protein alpha subunits thereby driving them into their inactive GDP-bound form
	ENSP00000398350	https://www.uniprot.org/uniprot/Q9H3H3	C11orf68
	ENSP00000398495	https://www.uniprot.org/uniprot/Q9NR28	AC048338.2 (DIABLO)	x				DIABLO homolog, mitochondrial; promotes apoptosis by activating caspases in the cytochrome c/Apaf-1/caspase-9 pathway; acts by opposing the inhibitory activity of inhibitor of apoptosis proteins (IAP); isoform 3 attenuates the stability and apoptosis-inhibiting activity of XIAP/BIRC4 by promoting XIAP/BIRC4 ubiquitination and degradation through the ubiquitin-proteasome pathway
	ENSP00000399718	https://www.uniprot.org/uniprot/Q9NS73	MBIP					Inhibits the MAP3K12 activity to induce the activation of the JNK/SAPK pathway; component of the ATAC complex, a complex with histone acetyltransferase activity on histones H3 and H4
	ENSP00000404676	https://www.uniprot.org/uniprot/P53609	PGGT1B					Transferase subunit; catalyzes the transfer of a geranyl-geranyl moiety from geranyl-geranyl pyrophosphate to a cysteine at the fourth position from the C-terminus of proteins having the C-terminal sequence Cys-aliphatic-aliphatic-X
	ENSP00000415481	https://www.uniprot.org/uniprot/O43490	PROM1		x			May play a role in cell differentiation, proliferation and apoptosis; binds cholesterol in cholesterol-containing plasma membrane microdomains and may play a role in the organization of the apical plasma membrane in epithelial cells; during early retinal development acts as a key regulator of disk morphogenesis; involved in regulation of MAPK and Akt signaling pathways; in neuroblastoma cells sup…		Cadherin binding; cilium
	ENSP00000416658	https://www.uniprot.org/uniprot/O75414	NME6					Kinase; major role in the synthesis of nucleoside triphosphates other than ATP
	ENSP00000433457	https://www.uniprot.org/uniprot/Q8NCP5	ZBTB44					May be involved in transcriptional regulation
	ENSP00000438590	https://www.uniprot.org/uniprot/Q9BSD3	RHNO1		x			Plays a role in DNA damage response (DDR) signaling
	ENSP00000440207	https://www.uniprot.org/uniprot/Q9Y2I9	TBC1D30					GTPase-activating protein (GAP) with broad specificity; acts as a GAP for RAB3A		Cilium
			NX	6	15	4	2

## Sheet: LIVER1
Supplementary Table S5. UniProtKB annotations relating to the functions of the proteins in all six sets
For details on parameter inference, see Materials and Methods.
LIVER1 sample
								UniProtKB visited at 11th + 12th of May 2020
	Protein Stable ID	UniProtKB functional annotation	Gene name	exocyt+endocyt+vesic+lysosom+proteasom+exocr+secern+secret	signal+cytokin (inkl. references to hormonal signaling; excl. cytokinesis)	hormon+andro+follicl+estro+prosta+insul+cortico+steroid+testost+endocr (excl. follicle development)	spermato+acrosom+test (excl. testost)	Function (according to UniProtKB and symbol/name)		GO - Molecular Function
	ENSP00000000412	https://www.uniprot.org/uniprot/P20645	M6PR	x				Transport of phosphorylated lysosomal enzymes from the Golgi complex and the cell surface to lysosomes
	ENSP00000168216	https://www.uniprot.org/uniprot/Q99714	HSD17B10		x	x		Mitochondrial dehydrogenase that catalyzes the beta-oxidation at position 17 of androgens and estrogens and has 3-alpha-hydroxysteroid dehydrogenase activity with androsterone; catalyzes the third step in the beta-oxidation of fatty acids; essential for structural and functional integrity of mitochondria; in addition to mitochondrial dehydrogenase activity, moonlights as a component of mitochondr…		Testosterone dehydrogenase activity
	ENSP00000219150	https://www.uniprot.org/uniprot/P31146	CORO1A	x				May be a crucial component of the cytoskeleton of highly motile cells, functioning both in the invagination of large pieces of plasma membrane, as well as in forming protrusions of the plasma membrane involved in cell locomotion; in mycobacteria-infected cells, its retention on the phagosomal membrane prevents fusion between phagosomes and lysosomes		Immune system; nervous system
	ENSP00000231420	https://www.uniprot.org/uniprot/Q9BYV1	AGXT2					Aminotransferase; mitochondrial; can metabolize asymmetric dimethylarginine (ADMA) via transamination to alpha-keto-delta-(NN-dimethylguanidino) valeric acid (DMGV)
	ENSP00000234827	https://www.uniprot.org/uniprot/Q96MN5	TCEANC2							Transcription, DNA-templated
	ENSP00000238561	https://www.uniprot.org/uniprot/Q86TW2	ADCK1					Kinase; appears to be essential for maintaining mitochondrial cristae formation and mitochondrial function by acting via YME1L1 in a kinase-independent manner to regulate essential mitochondrial structural proteins OPA1 and IMMT
	ENSP00000252597	https://www.uniprot.org/uniprot/Q8N6Y0	USHBP1							PDZ domain binding
	ENSP00000253382	https://www.uniprot.org/uniprot/Q9NR19	ACSS2					Synthase; catalyzes the synthesis of acetyl-CoA from short-chain fatty acids
	ENSP00000254770	https://www.uniprot.org/uniprot/Q9NS86	LANCL2		x			Necessary for abscisic acid (ABA) binding on the cell membrane and activation of the ABA signaling pathway in granulocytes
	ENSP00000257904	https://www.uniprot.org/uniprot/P11802	CDK4					Ser/Thr-kinase component of cyclin D-CDK4 (DC) complexes that phosphorylate and inhibit members of the retinoblastoma (RB) protein family including RB1 and regulate the cell-cycle during G1/S transition.
	ENSP00000258774	https://www.uniprot.org/uniprot/O60921	HUS1					Component of the 9-1-1 cell-cycle checkpoint response complex that plays a major role in DNA repair		Telomere maintenance
	ENSP00000261366	https://www.uniprot.org/uniprot/P20700	LMNB1					Lamins are components of the nuclear lamina, a fibrous layer on the nucleoplasmic side of the inner nuclear membrane, which is thought to provide a framework for the nuclear envelope and may also interact with chromatin; the structural integrity of the lamina is strictly controlled by the cell cycle
	ENSP00000261889	https://www.uniprot.org/uniprot/Q13596	SNX1					Involved in several stages of intracellular trafficking
	ENSP00000262715	https://www.uniprot.org/uniprot/Q99973	TEP1					Component of the telomerase ribonucleoprotein complex that is essential for the replication of chromosome termini		p53 binding; telomerase activity
	ENSP00000264108	https://www.uniprot.org/uniprot/O14929	HAT1					Acetyltransferase; acetylates soluble but not nucleosomal histone H4 at 'Lys-5' (H4K5ac) and 'Lys-12' (H4K12ac) and, to a lesser extent, acetylates histone H2A at 'Lys-5' (H2AK5ac)
	ENSP00000264645	https://www.uniprot.org/uniprot/O15234	CASC3					Required for pre-mRNA splicing as component of the spliceosome
	ENSP00000265381	https://www.uniprot.org/uniprot/Q02410	APBA1	x				Putative function in synaptic vesicle exocytosis by binding to Munc18-1, an essential component of the synaptic vesicle exocytotic machinery
	ENSP00000265404	https://www.uniprot.org/uniprot/Q9ULZ2	STAP1		x			In BCR signaling, appears to function as a docking protein acting downstream of TEC and participates in a positive feedback loop by increasing the activity of TEC
	ENSP00000265990	https://www.uniprot.org/uniprot/O14981	BTAF1					Regulates transcription in association with TATA binding protein (TBP). Removes TBP from the TATA box in an ATP-dependent manner
	ENSP00000272322	https://www.uniprot.org/uniprot/Q9P1Q0	VPS54	x				Acts as component of the GARP complex that is involved in retrograde transport from early and late endosomes to the trans-Golgi network TGN); the GARP complex is required for the maintenance of the cycling of mannose 6-phosphate receptors between the TGN and endosomes; this cycling is necessary for proper lysosomal sorting of acid hydrolases
	ENSP00000273920	https://www.uniprot.org/uniprot/Q9UHY7	ENOPH1					Bifunctional enzyme that catalyzes the enolization of 2,3-diketo-5-methylthiopentyl-1-phosphate (DK-MTP-1-P) into the intermediate 2-hydroxy-3-keto-5-methylthiopentenyl-1-phosphate (HK-MTPenyl-1-P), which is then dephosphorylated to form the acireductone 1,2-dihydroxy-3-keto-5-methylthiopentene
	ENSP00000284240	https://www.uniprot.org/uniprot/P04216	THY1					May play a role in cell-cell or cell-ligand interactions during synaptogenesis and other events in the brain
	ENSP00000288602	https://www.uniprot.org/uniprot/P15056	BRAF		x			Protein kinase involved in the transduction of mitogenic signals from the cell membrane to the nucleus (Probable); phosphorylates MAP2K1, and thereby activates the MAP kinase signal transduction pathway; hippocampal neurons
	ENSP00000294309	https://www.uniprot.org/uniprot/Q8NHX9	TPCN2	x				Nicotinic acid adenine dinucleotide phosphate (NAADP) receptor that may function as one of the major voltage-gated Ca2+ channels (VDCC) across the lysosomal membrane
	ENSP00000296473	https://www.uniprot.org/uniprot/Q86VX9	MON1A	x				Plays an important role in membrane trafficking through the secretory apparatus
	ENSP00000298694	https://www.uniprot.org/uniprot/Q8TER5	ARHGEF40					May act as a guanine nucleotide exchange factor (GEF)
	ENSP00000300134	https://www.uniprot.org/uniprot/P42226	STAT6		x			Carries out a dual function: signal transduction and activation of transcription; involved in IL4/interleukin-4- and IL3/interleukin-3-mediated signaling		Regulation of cell population proliferation; defense response
	ENSP00000301149	https://www.uniprot.org/uniprot/P21695	GPD1					Dehydrogenase		Glycerol-3-phosphate dehydrogenase [NAD+] activity; carbohydrate metabolic process
	ENSP00000304669	https://www.uniprot.org/uniprot/P35221	CTNNA1					Associates with the cytoplasmic domain of a variety of cadherins; the association of catenins to cadherins produces a complex which is linked to the actin filament network, and which seems to be of primary importance for cadherins cell-adhesion properties
	ENSP00000309432	https://www.uniprot.org/uniprot/Q86VR2	RETREG3					Mediates NRF1-enhanced neurite outgrowth
	ENSP00000311300	https://www.uniprot.org/uniprot/P56202	CTSW					May have a specific function in the mechanism or regulation of T-cell cytolytic activity; immune system
	ENSP00000318177	https://www.uniprot.org/uniprot/Q96I24	FUBP3					May interact with single-stranded DNA from the far-upstream element (FUSE); may activate gene expression
	ENSP00000325612	https://www.uniprot.org/uniprot/Q9Y2X0	MED16					Component of the Mediator complex, a coactivator involved in the regulated transcription of nearly all RNA polymerase II-dependent genes
	ENSP00000328524	https://www.uniprot.org/uniprot/Q6IQ26	DENND5A					Guanine nucleotide exchange factor (GEF) which may activate RAB6A and RAB39A and/or RAB39B; promotes the exchange of GDP to GTP, converting inactive GDP-bound Rab proteins into their active GTP-bound form; involved in the negative regulation of neurite outgrowth
	ENSP00000331897	https://www.uniprot.org/uniprot/P48735	IDH2					Dehydrogenase, mitochondrial; plays a role in intermediary metabolism and energy production
	ENSP00000338348	https://www.uniprot.org/uniprot/P60604	UBE2G2					Conjugating enzyme; accepts ubiquitin from the E1 complex and catalyzes its covalent attachment to other proteins
	ENSP00000344223	https://www.uniprot.org/uniprot/Q14703	MBTPS1	x				Serine protease that catalyzes the first step in the proteolytic activation of the sterol regulatory element-binding proteins (SREBPs); other known substrates are BDNF, GNPTAB and ATF6; mediates the protein cleavage of GNPTAB into subunit alpha and beta, thereby participating in biogenesis of lysosomes; involved in the regulation of M6P-dependent Golgi-to-lysosome trafficking of lysosomal enzymes…
	ENSP00000346478	https://www.uniprot.org/uniprot/Q86TH1	ADAMTSL2					Entry little informative in the present context		Microfibrill binding
	ENSP00000347184	https://www.uniprot.org/uniprot/P42858	HTT	x				May play a role in microtubule-mediated transport or vesicle function; myristoylated N-terminal fragment of the encoded protein, Huntingtin, promotes formation of autophagic vesicles		p53 binding
	ENSP00000347532	https://www.uniprot.org/uniprot/A0MZ66	SHTN1		x			Involved in the generation of internal asymmetric signals required for neuronal polarization and neurite outgrowth
	ENSP00000348010	https://www.uniprot.org/uniprot/Q86UA1	PRPF39					Involved in pre-mRNA splicing.
	ENSP00000348933	https://www.uniprot.org/uniprot/Q86WR0	CCDC25
	ENSP00000350676	https://www.uniprot.org/uniprot/Q9UPP1	PHF8					Histone lysine demethylase with selectivity for the di- and monomethyl states that plays a key role cell cycle progression, rDNA transcription and brain development		Brain development
	ENSP00000351159	https://www.uniprot.org/uniprot/O75175	CNOT3					Component of the CCR4-NOT complex which is one of the major cellular mRNA deadenylases and is linked to various cellular processes including bulk mRNA degradation, miRNA-mediated repression, translational repression during translational initiation and general transcription regulation; involved in mitotic progression and regulation of the spindle assembly checkpoint by regulating the stability of …		Regulation of stem cell population maintenance
	ENSP00000355541	https://www.uniprot.org/uniprot/Q9H583	HEATR1					Ribosome biogenesis factor; involved in nucleolar processing of pre-18S ribosomal RNA; required for optimal pre-ribosomal RNA transcription by RNA polymerase I
	ENSP00000357175	https://www.uniprot.org/uniprot/P41162	ETV3					Transcriptional repressor that contribute to growth arrest during terminal macrophage differentiation by repressing target genes involved in Ras-dependent proliferation		Negative regulation of cell population proliferation
	ENSP00000357869	https://www.uniprot.org/uniprot/Q9UBF8	PI4KB					Kinase; phosphorylates phosphatidylinositol (PI) in the first committed step in the production of the second messenger inositol-1,4,5,-trisphosphate (PIP); may regulate Golgi disintegration/reorganization during mitosis, possibly via its phosphorylation; involved in Golgi-to-plasma membrane trafficking		Mitochondrion
	ENSP00000361264	https://www.uniprot.org/uniprot/Q13905	RAPGEF1		x			Guanine nucleotide-releasing protein that binds to SH3 domain of CRK and GRB2/ASH; transduces signals from CRK to activate RAS; involved in cell branching and adhesion mediated by BCAR1-CRK-RAPGEF1 signaling and activation of RAP1; plays a role in the establishment of basal endothelial barrier function; plays a role in nerve growth factor (NGF)-induced sustained activation of Rap1 and neurite out…
	ENSP00000361285	https://www.uniprot.org/uniprot/Q9HA47	UCK1					Kinase; phosphorylates uridine and cytidine to uridine monophosphate and cytidine monophosphate
	ENSP00000361900	https://www.uniprot.org/uniprot/Q15785	TOMM34					Import receptor subunit; weak ATPase activity; mitochondrial; plays a role in the import of cytosolically synthesized preproteins into mitochondria; binds the mature portion of precursor proteins; may be a chaperone-like protein that helps to keep newly synthesized precursors in an unfolded import compatible state
	ENSP00000363161	https://www.uniprot.org/uniprot/Q5VZI3	TMEM268
	ENSP00000365220	https://www.uniprot.org/uniprot/Q5VZU9	TPP2					Symbol + GO -> Peptidase		Serine-type endopeptidase activity
	ENSP00000366271	https://www.uniprot.org/uniprot/Q8NHM5	KDM2B					Histone demethylase that demethylates 'Lys-4' and 'Lys-36' of histone H3
	ENSP00000366395	https://www.uniprot.org/uniprot/Q86TM6	SYVN1					Acts as an E3 ubiquitin-protein ligase
	ENSP00000367123	https://www.uniprot.org/uniprot/P08195	SLC3A2					Component of several heterodimeric amino acid transporter complexes
	ENSP00000369411	https://www.uniprot.org/uniprot/P40938	RFC3					The elongation of primed DNA templates by DNA polymerase delta and epsilon requires the action of the accessory proteins proliferating cell nuclear antigen (PCNA) and activator 1
	ENSP00000370695	https://www.uniprot.org/uniprot/Q9NV70	EXOC1	x				Component of the exocyst complex involved in the docking of exocytic vesicles with fusion sites on the plasma membrane
	ENSP00000372201	https://www.uniprot.org/uniprot/Q5BJH2	TMEM128
	ENSP00000376071	https://www.uniprot.org/uniprot/Q6P1L5	FAM117B
	ENSP00000376436	https://www.uniprot.org/uniprot/P14921	ETS1		x			Transcription factor; directly controls the expression of cytokine and chemokine genes in a wide variety of different cellular contexts
	ENSP00000377148	https://www.uniprot.org/uniprot/O43747	AP1G1		x			Subunit of clathrin-associated adaptor protein complex 1 that plays a role in protein sorting in the late-Golgi/trans-Golgi network (TGN) and/or endosomes; the AP complexes mediate both the recruitment of clathrin to membranes and the recognition of sorting signals within the cytosolic tails of transmembrane cargo molecules
	ENSP00000378405	https://www.uniprot.org/uniprot/O14874	BCKDK					Dehydrogenase; mitochondrial; catalyzes the phosphorylation and inactivation of the branched-chain alpha-ketoacid dehydrogenase complex, the key regulatory enzyme of the valine, leucine and isoleucine catabolic pathway
	ENSP00000384222	https://www.uniprot.org/uniprot/Q6AWC2	WWC2							Kinase binding
	ENSP00000387365	https://www.uniprot.org/uniprot/Q13610	PWP1					Chromatin-associated factor that regulates transcription
	ENSP00000391596	https://www.uniprot.org/uniprot/Q9Y303	AMDHD2					Deacetylase; hydrolyzes the N-glycolyl group from N-glycolylglucosamine 6-phosphate (GlcNGc-6-P) in the N-glycolylneuraminic acid (Neu5Gc) degradation pathway
	ENSP00000401191	https://www.uniprot.org/uniprot/O43709	BUD23					S-adenosyl-L-methionine-dependent methyltransferase that specifically methylates the N7 position of a guanine in 18S rRNA
	ENSP00000414558	https://www.uniprot.org/uniprot/Q8TB40	ABHD4					Lysophospholipase selective for N-acyl phosphatidylethanolamine (NAPE)
	ENSP00000419665	https://www.uniprot.org/uniprot/Q04837	SSBP1					Mitochondrial; binds preferentially and cooperatively to pyrimidine rich single-stranded DNA
	ENSP00000430684	https://www.uniprot.org/uniprot/O14920	IKBKB		x			Serine kinase that plays an essential role in the NF-kappa-B signaling pathway which is activated by multiple stimuli such as inflammatory cytokines
	ENSP00000438689	https://www.uniprot.org/uniprot/P49748	ACADVL					Dehydrogenase; mitochondrial; active toward esters of long-chain and very long chain fatty acids such as palmitoyl-CoA, myristoyl-CoA and stearoyl-CoA
	ENSP00000451211	https://www.uniprot.org/uniprot/Q8NHV4	NEDD1					Required for mitosis progression; promotes the nucleation of microtubules from the spindle		Ciliary basal body
	ENSP00000451261	https://www.uniprot.org/uniprot/Q9Y385	UBE2J1				x	Catalyzes the covalent attachment of ubiquitin to other protein; functions in the selective degradation of misfolded membrane proteins from the endoplasmic reticulum (ERAD)		Spermatogenesis
	ENSP00000452181	https://www.uniprot.org/uniprot/Q9H9C1	VIPAS39	x			x	Symbol -> Spermatogenesis-defective protein 39 homolog; annotation -> may play a role in lysosomal trafficking; may play a role in vesicular trafficking during spermatogenesis
	ENSP00000458663	https://www.uniprot.org/uniprot/Q96RK0	CIC					Transcriptional repressor which plays a role in development of the central nervous system (CNS); in concert with ATXN1 and ATXN1L, involved in brain development
	ENSP00000465894	https://www.uniprot.org/uniprot/Q53F39	MPPE1					Metallophosphoesterase required for transport of GPI-anchor proteins from the endoplasmic reticulum to the Golgi
	ENSP00000475168	https://www.uniprot.org/uniprot/O15258	RER1					Involved in the retrieval of endoplasmic reticulum membrane proteins from the early Golgi compartment
	ENSP00000476145	https://www.uniprot.org/uniprot/P42685	FRK					Non-receptor tyrosine-protein kinase that negatively regulates cell proliferation; positively regulates PTEN protein stability through phosphorylation of PTEN on 'Tyr-336', which in turn prevents its ubiquitination and degradation
			NX	10	10	1	2

## Sheet: LIVER2
Supplementary Table S5. UniProtKB annotations relating to the functions of the proteins in all six sets
For details on parameter inference, see Materials and Methods.
LIVER2 sample
								UniProtKB visited at 12th of May 2020
	Protein Stable ID	UniProtKB functional annotation	Gene name	exocyt+endocyt+vesic+lysosom+proteasom+exocr+secern+secret	signal+cytokin (inkl. references to hormonal signaling; excl. cytokinesis)	hormon+andro+follicl+estro+prosta+insul+cortico+steroid+testost+endocr (excl. follicle development)	spermato+acrosom+test (excl. testost)	Function (according to UniProtKB and symbol/name)		GO - Molecular Function
	ENSP00000074304	https://www.uniprot.org/uniprot/Q96PE3	INPP4A					Phosphatase; catalyzes the hydrolysis of the 4-position phosphate of phosphatidylinositol 3,4-bisphosphate (PtdIns(3,4)P2); antagonizes the PI3K-AKT/PKB signaling pathway by dephosphorylating phosphoinositides and thereby modulating cell cycle progression and cell survival
	ENSP00000170447	https://www.uniprot.org/uniprot/Q9H000	MKRN2					Ligase; E3 ubiquitin ligase catalyzing the covalent attachment of ubiquitin moieties onto substrate proteins
	ENSP00000210444	https://www.uniprot.org/uniprot/Q9NR45	NANS					Synthase; produces N-acetylneuraminic acid (Neu5Ac) and 2-keto-3-deoxy-D-glycero-D-galacto-nononic acid (KDN)
	ENSP00000221466	https://www.uniprot.org/uniprot/P55899	FCGRT					Cell surface receptor that transfers passive humoral immunity from the mother to the newborn; binds to the Fc region of monomeric immunoglobulin gamma and mediates its selective uptake from milk
	ENSP00000223145	https://www.uniprot.org/uniprot/Q86VQ1	GLCCI1		x	x		Symbol -> Glucocorticoid
	ENSP00000227155	https://www.uniprot.org/uniprot/P27701	CD82		x			Associates with CD4 or CD8 and delivers costimulatory signals for the TCR/CD3 pathway
	ENSP00000232219	https://www.uniprot.org/uniprot/P09455	RBP1					Cytoplasmic retinol-binding protein
	ENSP00000232978	https://www.uniprot.org/uniprot/P30414	NKTR					Isomerase; PPIase that catalyzes the cis-trans isomerization of proline imidic peptide bonds in oligopeptides and may therefore assist protein folding
	ENSP00000236925	https://www.uniprot.org/uniprot/Q08AD1	CAMSAP2					Key microtubule-organizing protein that specifically binds the minus-end of non-centrosomal microtubules and regulates their dynamics and organization; specifically recognizes growing microtubule minus-ends and autonomously decorates and stabilizes microtubule lattice formed by microtubule minus-end polymerization; also acts as a regulator of neuronal polarity and development
	ENSP00000240079	https://www.uniprot.org/uniprot/Q9Y3C0	WASHC3					Acts at least in part as component of the WASH core complex whose assembly at the surface of endosomes might inhibit WASH nucleation-promoting factor (NPF) activity in recruiting and activating the Arp2/3 complex to induce actin polymerization
	ENSP00000253109	https://www.uniprot.org/uniprot/Q8NI99	ANGPTL6					May play a role in the wound healing process; may promote epidermal proliferation, remodeling and regeneration
	ENSP00000253247	https://www.uniprot.org/uniprot/Q9H8H0	NOL11					Ribosome biogenesis factor
	ENSP00000257566	https://www.uniprot.org/uniprot/O15119	TBX3					Transcriptional repressor involved in developmental processes
	ENSP00000259632	https://www.uniprot.org/uniprot/O75935	DCTN3					Together with dynein may be involved in spindle assembly and cytokinesis
	ENSP00000261267	https://www.uniprot.org/uniprot/P61626	LYZ					Lysozymes have primarily a bacteriolytic function; those in tissues and body fluids are associated with the monocyte-macrophage system and enhance the activity of immunoagents
	ENSP00000261514	https://www.uniprot.org/uniprot/P51790	CLCN3	x				Mediates the exchange of chloride ions against protons; functions as antiporter and contributes to the acidification of the endosome and synaptic vesicle lumen, and may thereby affect vesicle trafficking and exocytosis; may play an important role in neuronal cell function
	ENSP00000261590	https://www.uniprot.org/uniprot/Q14126	DSG2					Component of intercellular desmosome junctions
	ENSP00000261647	https://www.uniprot.org/uniprot/Q6DKK2	TTC19					Required for the preservation of the structural and functional integrity of mitochondrial respiratory complex III
	ENSP00000263401	https://www.uniprot.org/uniprot/Q9P000	COMMD9					May modulate activity of cullin-RING E3 ubiquitin ligase (CRL) complexes; may down-regulate activation of NF-kappa-B; modulates Na+ transport in epithelial cells by regulation of apical cell surface expression of amiloride-sensitive sodium channel (ENaC) subunits
	ENSP00000263686	https://www.uniprot.org/uniprot/P16109	SELP					Immune system; Ca2+-dependent receptor for myeloid cells that binds to carbohydrates on neutrophils and monocytes
	ENSP00000265560	https://www.uniprot.org/uniprot/Q13107	USP4					Hydrolase; deubiquitinating enzyme that removes conjugated ubiquitin from target proteins
	ENSP00000266581	https://www.uniprot.org/uniprot/Q86SJ2	AMIGO2					Required for depolarization-dependent survival of cultured cerebellar granule neurons		brain development
	ENSP00000268058	https://www.uniprot.org/uniprot/P29590	PML					Functions via its association with PML-nuclear bodies (PML-NBs) in a wide range of important cellular processes, including tumor suppression, transcriptional regulation, apoptosis, senescence, DNA damage response, and viral defense mechanisms
	ENSP00000271064	https://www.uniprot.org/uniprot/Q9GZM7	TINAGL1		x	x		May be implicated in the adrenocortical zonation and in mechanisms for repressing the CYP11B1 gene expression in adrenocortical cells
	ENSP00000272519	https://www.uniprot.org/uniprot/P11234	RALB					Multifunctional GTPase involved in a variety of cellular processes including gene expression, cell migration, cell proliferation, oncogenic transformation and membrane trafficking; required both to stabilize the assembly of the exocyst complex and to localize functional exocyst complexes to the leading edge of migrating cells
	ENSP00000273588	https://www.uniprot.org/uniprot/P48728	AMT					Aminomethyltransferase; mitochondrial; degradation of glycine
	ENSP00000274849	https://www.uniprot.org/uniprot/Q9ULW3	ABT1					Could be a novel TATA-binding protein (TBP) which can function as a basal transcription activator
	ENSP00000279227	https://www.uniprot.org/uniprot/Q86UX7	FERMT3					Plays a central role in cell adhesion in hematopoietic cells
	ENSP00000280734	https://www.uniprot.org/uniprot/Q8N2M4	TMEM86A					Symbol -> Lysoplasmalogenase-like protein TMEM86A		alkenylglycerophosphoethanolamine hydrolase activity
	ENSP00000284503	https://www.uniprot.org/uniprot/Q969S2	NEIL2					Endonuclease; involved in base excision repair of DNA damaged by oxidation or by mutagenic agents.
	ENSP00000289004	https://www.uniprot.org/uniprot/P32754	HPD					Dioxygenase; key enzyme in the degradation of tyrosine
	ENSP00000305071	https://www.uniprot.org/uniprot/O14593	RFXANK					Activates transcription from class II MHC promoters
	ENSP00000311427	https://www.uniprot.org/uniprot/Q8WV41	SNX33	x				Plays a role in the reorganization of the cytoskeleton, endocytosis and cellular vesicle trafficking via its interactions with membranes, WASL, DNM1 and DNM2; acts both during interphase and at the end of mitotic cell divisions; modulates endocytosis of cell-surface proteins, such as APP and PRNP
	ENSP00000314067	https://www.uniprot.org/uniprot/Q13177	PAK2		x			Kinase; serine/threonine protein kinase that plays a role in a variety of different signaling pathways including cytoskeleton regulation, cell motility, cell cycle progression, apoptosis or proliferation
	ENSP00000314556	https://www.uniprot.org/uniprot/Q9BZF9	UACA					Regulates APAF1 expression and plays an important role in the regulation of stress-induced apoptosis
	ENSP00000316032	https://www.uniprot.org/uniprot/P52948	NUP98					Plays a role in the nuclear pore complex (NPC) assembly and/or maintenance; NUP98 and NUP96 are involved in the bidirectional transport across the NPC; in cooperation with DHX9, plays a role in transcription and alternative splicing activation of a subset of genes
	ENSP00000318176	https://www.uniprot.org/uniprot/O75569	PRKRA					Activates EIF2AK2/PKR in the absence of double-stranded RNA (dsRNA), leading to phosphorylation of EIF2S1/EFI2-alpha and inhibition of translation and induction of apoptosis
	ENSP00000322730	https://www.uniprot.org/uniprot/Q9NQX7	ITM2C					Negative regulator of amyloid-beta peptide production
	ENSP00000325312	https://www.uniprot.org/uniprot/P50579	METAP2					Aminopeptidase; cotranslationally removes the N-terminal methionine from nascent proteins
	ENSP00000326804	https://www.uniprot.org/uniprot/Q13616	CUL1		x			Core component of multiple cullin-RING-based SCF (SKP1-CUL1-F-box protein) E3 ubiquitin-protein ligase complexes, which mediate the ubiquitination of proteins involved in cell cycle progression, signal transduction and transcription
	ENSP00000329357	https://www.uniprot.org/uniprot/P08047	SP1					Transcription factor that can activate or repress transcription in response to physiological and pathological stimuli; binds with high affinity to GC-rich motifs and regulates the expression of a large number of genes involved in a variety of processes such as cell growth, apoptosis, differentiation and immune responses
	ENSP00000333900	https://www.uniprot.org/uniprot/Q8WWZ8	OIT3					May be involved in hepatocellular function and development		calcium ion binding; urate homeostasis
	ENSP00000339958	https://www.uniprot.org/uniprot/Q9Y2I1	NISCH		x			Acts either as the functional imidazoline-1 receptor (I1R) candidate or as a membrane-associated mediator of the I1R signaling; binds numerous imidazoline ligands that induces initiation of cell-signaling cascades triggering to cell survival, growth and migration
	ENSP00000340243	https://www.uniprot.org/uniprot/Q13530	SERINC3					Restriction factor required to restrict infectivity of lentiviruses
	ENSP00000343706	https://www.uniprot.org/uniprot/Q9H213	MAGEH1
	ENSP00000345728	https://www.uniprot.org/uniprot/Q04656	ATP7A	x				ATPase; may supply copper to copper-requiring proteins within the secretory pathway
	ENSP00000347464	https://www.uniprot.org/uniprot/Q14161	GIT2					GTPase-activating protein for the ADP ribosylation factor family
	ENSP00000350934	https://www.uniprot.org/uniprot/Q9H5N1	RABEP2					Plays a role in membrane trafficking and in homotypic early endosome fusion; by interacting with SDCCAG8, localizes to centrosomes and plays a critical role in ciliogenesis
	ENSP00000351052	https://www.uniprot.org/uniprot/Q86WB0	ZC3HC1					Essential component of a SCF-type E3 ligase complex, SCF(NIPA), a complex that controls mitotic entry by mediating ubiquitination and subsequent degradation of cyclin B1 (CCNB1)
	ENSP00000351740	https://www.uniprot.org/uniprot/Q8IWE2	FAM114A1					May play a role in neuronal cell development
	ENSP00000356481	https://www.uniprot.org/uniprot/Q9BZQ8	NIBAN1					Regulates phosphorylation of a number of proteins involved in translation regulation including EIF2A, EIF4EBP1 and RPS6KB1
	ENSP00000357065	https://www.uniprot.org/uniprot/Q969P0	IGSF8	x				May play a key role in diverse functions ascribed to CD81 and CD9 such as oocytes fertilization or hepatitis C virus function
	ENSP00000360916	https://www.uniprot.org/uniprot/P52735	VAV2					Guanine nucleotide exchange factor for the Rho family of Ras-related GTPases
	ENSP00000362010	https://www.uniprot.org/uniprot/P20073	ANXA7	x				Calcium/phospholipid-binding protein which promotes membrane fusion and is involved in exocytosis
	ENSP00000362170	https://www.uniprot.org/uniprot/Q69YI7	NAIF1					Induces apoptosis
	ENSP00000363516	https://www.uniprot.org/uniprot/Q9UKA8	RCAN3					Inhibits calcineurin-dependent transcriptional responses by binding to the catalytic domain of calcineurin A; could play a role during central nervous system development
	ENSP00000363603	https://www.uniprot.org/uniprot/P04066	FUCA1					Fucosidase; alpha-L-fucosidase is responsible for hydrolyzing the alpha-1,6-linked fucose joined to the reducing-end N-acetylglucosamine of the carbohydrate moieties of glycoproteins
	ENSP00000363921	https://www.uniprot.org/uniprot/Q8TEW0	PARD3					Adapter protein involved in asymmetrical cell division and cell polarization processes; required for establishment of neuronal polarity and normal axon formation in cultured hippocampal neurons
	ENSP00000365227	https://www.uniprot.org/uniprot/P55008	AIF1					Immune response; actin-binding protein that enhances membrane ruffling and RAC activation; binds calcium
	ENSP00000370337	https://www.uniprot.org/uniprot/O94986	CEP152					Necessary for centrosome duplication; overexpression of CEP152 can drive amplification of centrioles
	ENSP00000379601	https://www.uniprot.org/uniprot/P51159	RAB27A	x				Small GTPase which cycles between active GTP-bound and inactive GDP-bound states; in its active state, binds to a variety of effector proteins to regulate homeostasis of late endocytic pathway, including endosomal positioning, maturation and secretion; immune system
	ENSP00000380271	https://www.uniprot.org/uniprot/Q8WZA2	RAPGEF4	x				Guanine nucleotide exchange factor (GEF) for RAP1A, RAP1B and RAP2A small GTPases that is activated by binding cAMP; seems not to activate RAB3A; involved in cAMP-dependent, PKA-independent exocytosis through interaction with RIMS2
	ENSP00000383986	https://www.uniprot.org/uniprot/Q96GN5	CDCA7L		x			Plays a role in transcriptional regulation as a repressor that inhibits monoamine oxidase A (MAOA) activity and gene expression by binding to the promoter; involved in apoptotic signaling pathways
	ENSP00000386636	https://www.uniprot.org/uniprot/P05455	SSB					Binds to the 3' poly(U) terminus of nascent RNA polymerase III transcripts, protecting them from exonuclease digestion and facilitating their folding and maturation
	ENSP00000387261	https://www.uniprot.org/uniprot/Q9H939	PSTPIP2					Binds to F-actin; may be involved in regulation of the actin cytoskeleton
	ENSP00000390849	https://www.uniprot.org/uniprot/Q8WTS1	ABHD5					Coenzyme A-dependent lysophosphatidic acid acyltransferase that catalyzes the transfert of an acyl group on a lysophosphatidic acid; functions in phosphatidic acid biosynthesis; may regulate the cellular storage of triacylglycerol through activation of the phospholipase PNPLA2; regulates lipid droplet fusion
	ENSP00000395738	https://www.uniprot.org/uniprot/F2Z2W7	TRMT2A					Symbol -> Methyltransferase		RNA methyltransferase activity
	ENSP00000406191	https://www.uniprot.org/uniprot/Q9HBA0	TRPV4		x			Non-selective calcium permeant cation channel involved in osmotic sensitivity and mechanosensitivity; together with PKD2, forms mechano- and thermosensitive channels in cilium; regulates expression of chemokines and cytokines related to proinflammatory pathway in adipocytes; together with AQP5, controls regulatory volume decrease in salivary epithelial cells
	ENSP00000408295	https://www.uniprot.org/uniprot/P40937	RFC5					The elongation of primed DNA templates by DNA polymerase delta and epsilon requires the action of the accessory proteins proliferating cell nuclear antigen (PCNA) and activator 1
	ENSP00000411012	https://www.uniprot.org/uniprot/Q92636	NSMAF					Couples the p55 TNF-receptor (TNF-R55 / TNFR1) to neutral sphingomyelinase; nervous system
	ENSP00000414237	https://www.uniprot.org/uniprot/Q9H0H0	INTS2					Component of the Integrator (INT) complex, a complex involved in the small nuclear RNAs (snRNA) U1 and U2 transcription and in their 3'-box-dependent processing
	ENSP00000450436	https://www.uniprot.org/uniprot/Q02252	ALDH6A1					Mitochondrial; plays a role in valine and pyrimidine metabolism; binds fatty acyl-CoA
	ENSP00000451752	https://www.uniprot.org/uniprot/P11277	SPTB					Spectrin is the major constituent of the cytoskeletal network underlying the erythrocyte plasma membrane
	ENSP00000452762	https://www.uniprot.org/uniprot/P13804	ETFA					Heterodimeric electron transfer flavoprotein that accepts electrons from several mitochondrial dehydrogenases, including acyl-CoA dehydrogenases, glutaryl-CoA and sarcosine dehydrogenase; it transfers the electrons to the main mitochondrial respiratory chain via ETF-ubiquinone oxidoreductase (ETF dehydrogenase); required for normal mitochondrial fatty acid oxidation and normal amino acid metaboli…
	ENSP00000470298	https://www.uniprot.org/uniprot/Q7Z406	MYH14	x				Cellular myosin that appears to play a role in cytokinesis, cell shape, and specialized functions such as secretion and capping
	ENSP00000479919	https://www.uniprot.org/uniprot/Q9Y371	SH3GLB1					May be required for normal outer mitochondrial membrane dynamics; isoform 2 acts antiapoptotic in neuronal cells; involved in maintenance of mitochondrial morphology and promotes neuronal viability
	ENSP00000489189	https://www.uniprot.org/uniprot/J3QTA2	BAG1							Chaperone binding
			NX	8	8	2	0
